# Supplementary material for: SnRK1-triggered switch of bZIP63 dimerization mediates the low-energy response in plants
Source: eLife. 2015 Aug 11;4:e05828. doi: 10.7554/eLife.05828 (PMC4558565; doi:10.7554/eLife.05828)
Supplement: Figure 2—source data 1. — Table of relative metabolite levels in Ws-2, bzip63, Col-0 and ox#3 after 6 hr in light or extended night, which were used to calculate the log2-fold changes shown in Figure 2 and Figure 2—figure supplement 1. Mean values and SD of five biological replicates are given as fold changes to the corresponding wt. p-values from T-tests between wt and mutant are listed. DOI: http://dx.doi.org/10.7554/eLife.05828.010 [file elife05828s002.xlsx]

## Sheet: fold changes and p-vlaues
Means (n=5) and standard deviations of metabolites measured in wild-type and bZIP63 mutant lines normalized to the corresponding wild-type.
p-values are from 2-tailed t-test assuming unequal variace
	6h light												6h extended night
	Ws-2 ecotype					Col-0 ecotype							Ws-2 ecotype					Col-0 ecotype
	wt		bzip63 ko			wt		bZIP63 ox#3					wt		bzip63 ko			wt		bZIP63 ox#3
Metabolites	mean	SD	mean	SD	p-values	mean	SD	mean	SD	p-values		Metabolites	mean	SD	mean	SD	p-values	mean	SD	mean	SD	p-values
Serine	1	0.171992	1.33446	0.200012	0.0224774	1	0.0845882	0.75799	0.0726348	0.00135022		Serine	1	0.207708	1.68332	0.227311	0.00113041	1	0.217115	1.01661	0.225377	0.802475
O-Acetyl-Serine	1	0.116114	1.18556	0.186289	0.102522	1	0.521088	0.641379	0.420195	0.266708		O-Acetyl-Serine	1	0.319585	2.46636	0.314121	8.26408e-05	1	0.444127	0.408311	0.251491	0.087328
Cysteine	1	0.408683	1.02677	0.440821	0.923149	1	0.355011	0.708117	0.471377	0.303226		Cysteine	1	0.652163	3.10913	0.881437	0.00316014	1	0.490699	1.1167	0.574156	0.906105
Glycine	1	0.0910787	2.76723	1.1609	0.0268637	1	0.440831	0.613108	0.303092	0.164253		Glycine	1	0.159862	0.965389	0.0756082	0.677731	1	0.197427	0.781742	0.442992	0.29205
Shikimate	1	0.159706	1.51877	0.260705	0.00748516	1	0.0331323	0.983952	0.0757069	0.68069		Shikimate	1	0.371215	2.13008	0.157458	0.00114817	1	0.0664781	1.01721	0.0706339	0.850084
Tryptophane	1	0.245606	1.46528	0.571293	0.150522	1	0.108865	0.901246	0.0829666	0.147995		Tryptophane	1	0.453765	2.68762	0.808432	0.00594398	1	0.175999	1.07629	0.085896	0.522083
Tyrosine	1	0.118735	1.4107	0.501421	0.142048	1	0.329787	0.749107	0.496881	0.378378		Tyrosine	1	0.317262	1.8805	0.220458	0.0013277	1	0.37133	0.54217	0.290824	0.0933092
Phenylalanine	1	0.186346	1.87665	0.441678	0.00810512	1	0.25148	0.622149	0.192562	0.0301909		Phenylalanine	1	0.241409	1.89148	0.188303	0.000238972	1	0.219392	0.509981	0.184411	0.0142039
Alanine	1	0.204339	1.83407	0.407129	0.00664367	1	0.354251	0.681072	0.345206	0.187369		Alanine	1	0.179747	2.04478	0.201184	2.65507e-05	1	0.506579	0.849371	0.259648	0.513035
Valine	1	0.103228	1.45978	0.421428	0.0699632	1	0.122097	0.783825	0.118409	0.0217647		Valine	1	0.150583	1.43262	0.0910681	0.00111916	1	0.143315	0.698898	0.16577	0.00549202
Leucine	1	0.168884	1.34829	0.326595	0.0785068	1	0.130499	0.687663	0.156818	0.00949856		Leucine	1	0.203675	1.57436	0.122651	0.00124289	1	0.0804611	0.587996	0.163401	0.00206866
Glutamate	1	0.234794	1.33177	0.433532	0.181835	1	0.745854	0.367966	0.147976	0.131391		Glutamate	1	0.891816	4.72075	2.89877	0.0429197	1	0.838208	0.287703	0.0617654	0.144331
Glutamine	1	0.426182	1.5833	0.313498	0.050156	1	0.641348	0.421222	0.322603	0.122311		Glutamine	1	0.532806	4.28241	1.78124	0.0122408	1	0.686893	0.268742	0.134634	0.109808
Proline	1	0.709884	4.51844	0.461391	5.1661e-05	1	0.365292	0.471581	0.326937	0.0428526		Proline	1	0.57362	8.21422	2.31412	0.00162443	1	0.178262	0.568508	0.260148	0.0246627
Ornithine	1	0.756933	1.73308	0.910279	0.204758	1	0.709613	1.10489	1.13556	0.866123		Ornithine	1	0.522932	2.90469	1.20563	0.0202397	1	0.697931	0.914947	0.355383	0.853792
Arginine	1	0.666809	1.88586	1.07979	0.164676	1	0.666101	0.862673	0.791442	0.774359		Arginine	1	0.658993	4.34743	2.6752	0.0470443	1	0.770202	0.518358	0.262516	0.288058
Aspartate	1	0.217507	1.23958	0.440702	0.318606	1	0.34796	0.639371	0.369322	0.150812		Aspartate	1	0.222922	3.19158	0.458837	9.00899e-05	1	0.294572	0.663944	0.37194	0.151238
Asparagine	1	0.147769	2.21397	0.742981	0.0203139	1	0.665183	0.56311	0.470495	0.268482		Asparagine	1	0.425644	2.84325	0.84246	0.00489341	1	0.491134	0.320417	0.123551	0.0773218
Lysine	1	0.179389	1.20222	0.325029	0.267337	1	0.372688	0.734627	0.379003	0.296685		Lysine	1	0.362354	1.77476	0.207675	0.00528543	1	0.369924	0.529234	0.333379	0.0831548
Beta alanine	1	0.121492	1.41841	0.212475	0.00781287	1	0.157051	0.640055	0.173834	0.00901991		Beta alanine	1	0.059758	1.9514	0.198883	0.00018553	1	0.0246658	0.908064	0.216219	0.413909
Homoserine	1	0.161873	2.15864	0.598893	0.0104825	1	0.46776	0.803996	0.638798	0.596352		Homoserine	1	0.375165	1.68568	0.312027	0.0143433	1	0.598079	0.39009	0.125328	0.141235
Methionine	1	0.253797	1.13704	0.25667	0.420589	1	0.302997	0.811634	0.390841	0.420628		Methionine	1	0.404705	2.03808	0.29754	0.00213571	1	0.264189	0.614379	0.330482	0.0718516
Threonine	1	0.0882679	1.1734	0.231989	0.177506	1	0.0164958	0.852019	0.223401	0.213017		Threonine	1	0.0497964	1.41956	0.129774	0.000883146	1	0.147659	0.880017	0.248452	0.294108
Isoleucine	1	0.0761592	1.57061	0.506845	0.0648397	1	0.103139	0.860043	0.08441	0.0480161		Isoleucine	1	0.186492	1.5456	0.117342	0.000992611	1	0.0791436	0.724979	0.112663	0.00183266
Pyruvate	1	0.166082	1.73895	0.114841	7.21742e-05	1	0.149888	1.63562	0.24783	0.00207341		Pyruvate	1	0.127683	0.672896	0.0654776	0.00226303	1	0.186348	0.895383	0.152932	0.144699
Citric acid	1	0.226489	1.04837	0.0449939	0.663297	1	0.258401	0.952294	0.358081	0.815776		Citric acid	1	0.266476	3.07796	0.390124	2.24519e-05	1	0.489065	0.723576	0.20457	0.26059
2-Oxoglutarate	1	0.276169	1.88449	0.627908	0.0309069	1	0.175685	1.69345	0.321969	0.00514634		2-Oxoglutarate	1	0.281538	1.19647	0.287071	0.306382	1	0.230923	1.29083	0.367431	0.281999
Succiniate	1	0.331634	1.04694	0.117473	0.777489	1	0.144025	1.09747	0.377843	0.612403		Succiniate	1	0.214431	0.85463	0.131791	0.239644	1	0.19642	0.929519	0.261918	0.518743
Fumarate	1	0.418265	1.39793	0.14067	0.101066	1	0.172376	1.09337	0.12844	0.362132		Fumarate	1	0.456209	1.67348	0.609678	0.0862095	1	0.309533	0.964771	0.375264	0.705574
Malate	1	0.435101	1.21214	0.125702	0.346138	1	0.0992814	0.804559	0.0275213	0.00946312		Malate	1	0.465828	1.68374	0.31779	0.0298984	1	0.250502	1.0273	0.44923	0.851398
Oxaloacetate	1	0.159214	1.26346	0.341912	0.172292	1	0.535246	1.10388	0.440282	0.746433		Oxaloacetate	1	0.208491	1.10888	0.307203	0.532831	1	0.185897	1.31758	0.451687	0.13143
Sucrose	1	0.184271	1.46483	0.18889	0.00430808	1	0.14408	1.53715	0.142712	0.000352713		Sucrose	1	0.328758	0.381011	0.0830737	0.0118034	1	0.0574292	7.42109	4.17034	0.0264559
Glucose	1	0.336299	1.23109	0.293337	0.280889	1	0.173464	0.681611	0.204774	0.0298146		Glucose	1	0.134405	0.559176	0.165847	0.00191566	1	0.235092	0.540231	0.0540482	0.000499807
Fructose	1	0.428214	1.22233	0.421714	0.432122	1	0.197657	0.83076	0.182795	0.19768		Fructose	1	0.643476	0.134883	0.0543131	0.0393991	1	0.42368	0.890186	0.474983	0.66228
Trehalose	1	0.178312	1.47681	0.175422	0.00566673	1	0.16066	1.7418	0.18004	0.000135743		Trehalose	1	0.445683	1.3046	0.145781	0.210447	1	0.276076	1.88611	0.39009	0.00723765
Myo-Inositol	1	0.310086	1.53914	0.222667	0.0152321	1	0.0635568	0.539431	0.0281227	1.19624e-05		Myo-Inositol	1	0.187931	2.19998	0.207906	1.25707e-05	1	0.155243	0.815223	0.121156	0.105723
Raffinose	1	0.669353	0.922412	0.502542	0.841366	1	0.441497	0.114859	0.0264294	0.0108535		Raffinose	1	0.246356	0.554655	0.563656	0.16133	1	0.745562	0.370867	0.123432	0.209347
Putrescine	1	0.256356	1.51639	0.536983	0.102616	1	0.63452	0.646851	0.504228	0.359835		Putrescine	1	0.379029	1.25367	0.276588	0.264313	1	0.462636	0.563811	0.10515	0.229854
Spermidine	1	0.204179	1.10736	0.442072	0.640631	1	0.108749	0.786403	0.293802	0.18702		Spermidine	1	0.37179	1.56792	0.1569	0.0230416	1	0.0169861	0.55612	0.274356	0.0222112
Ascorbate	1	0.0891718	1.27101	0.0884947	0.00501402	1	0.844472	0.260982	0.152623	0.122079		Ascorbate	1	0.975981	4.03604	0.999606	0.00125884	1	0.644578	1.24484	0.405138	0.725618
Dehydroascorbate	1	0.060743	0.792169	0.164861	0.0455213	1	0.253559	1.61012	0.513113	0.0556077		Dehydroascorbate	1	0.179819	1.11986	0.360137	0.530784	1	0.186639	1.28292	0.431345	0.337308
