# Supplementary material for: SnRK1-triggered switch of bZIP63 dimerization mediates the low-energy response in plants
Source: eLife. 2015 Aug 11;4:e05828. doi: 10.7554/eLife.05828 (PMC4558565; doi:10.7554/eLife.05828)
Supplement: Figure 4—source data 2. — The tab ‘kinase overview’ contains a table showing in which samples each kinase subunit was identified, including the number of peptides, proteotypic peptides, MASCOT (Matrix Science) score, and expected molecular weight. The other tabs list all peptides found for the kinase subunits in each sample and state whether the peptide is proteotypic (Y) or not. DOI: http://dx.doi.org/10.7554/eLife.05828.017 [file elife05828s004.xlsx]

## Sheet: kinase overview
Table of all identified kinase subunits including:
* kinase name, AGI code, MW of all splicing forms
* localization in nucleus reported? (Y/N) (references see Figure S3)
* number of samples the kinase subunit was found in (all/only samples with proteotypic peptides)								plant material and harvesting conditions
* information in which samples a kinase was found including number of peptides (proteotypic peptides), Mascot score and expected MW								2008-07-28					seedlings grown on 1/2 MS plates; harvested in the dark phase
note on protein scores: max. number of hits was set to AUTO → only significant hits are shown								2008-08-27					root cell suspension culture; grown and harvested in the dark
								2008-10-21					root cell suspension culture; grown and harvested in the dark
Color code								2007-12-17					roots from 8 week-old hydroponically grown plants (grown under short day conditions)
high confidence kinase subunits		found in 2 or more samples with at least one proteotypic peptide
low confidence kinase subunits		found in less than 2 samples or without proteotypic peptides
excluded kinase subunits		excluded du to wrong MW or subcellular localization (reason for exclusion is indicated in red)
				in nucleus? (experimental: GFP)		MW of splicing forms	fund in # of sampes	Samples and number of peptides found for a specific protein in the indicated samples. Samples are marked by sample ID (date) and expected MW range of proteins in this sample
								When peptides were found for a protein the following numbers are given:
								line 1: number of all peptides (proteotypic peptides) found in this sample; line 2: protein score (MASCOT)
Kinase family	Kinase name (short)	AGI	Kinase name (long)		citation for nuclear localization			5 (28.07.2008)	30-40kDa	4 (27.08.2008)	30-40kDa	5 (27.08.2008)	30-40kDa	6 (27.08.2008)	30-40kDa	7 (27.08.2008)	30-40kDa	8 (27.08.2008)	30-40kDa	9 (27.08.2008)	30-40kDa	3 (21.10.2008)	30-40kDa	4 (21.10.2008)	30-40kDa	2C (21.10.2008)	30-40kDa	3C (21.10.2008)	30-40kDa	5 (21.10.2008)	50-65kDa	7 (21.10.2008)	50-65kDa	8 (21.10.2008)	50-65kDa	9 (21.10.2008)	50-65kDa	10 (21.10.2008)	50-65kDa	5C (21.10.2008)	50-65kDa	6C (21.10.2008)	50-65kDa	7C (21.10.2008)	50-65kDa	A (21.10.2008)	50-65kDa	B (21.10.2008)	50-65kDa
SnRK1 subunits	AKIN10 / SnRK1.1	AT3G01090	SNF1 Kinase homolog 10, SNF1-related protein kinase 1.1	Y (GFP)	Bitrián et al., 2011; Bayer et al., 2012	58 / 61 / 58	9																											5 (4)		13 (10)		4 (4)				8 (7)		1 (1)				6 (5)
																																		73		247		111				144		54				92
	AKIN11 / SnRK1.2	AT3G29160	SNF1 Kinase homolog 11, SNF1-related protein kinase 1.2	Y (GFP)	Bitrián et al., 2011; Bayer et al., 2012	59 / 59 / 41	8 / 7																											8 (7)		11 (9)						6 (5)						11 (10)
	AKIN11 / SnRK1.2	AT3G29160	SNF1 Kinase homolog 11, SNF1-related protein kinase 1.2																															150		176						95						137
	AKIN12 / SnRK1.3	AT5G39440	SNF1 Kinase homolog 12, SNF1-related protein kinase 1.3	?		57	1 / 0
	AKIN12 / SnRK1.3	AT5G39440	SNF1 Kinase homolog 12, SNF1-related protein kinase 1.3
	AKINbeta2	AT4G16360	SnRK1 kinase regulatory subunit beta-2	Y (BiFC)	Gissot et al., 2006	29 / 29 / 29	1																							2 (2)
	AKINbeta2	AT4G16360	SnRK1 kinase regulatory subunit beta-2																											69
	SNF4	AT1G09020	Sucrose Nonfermenting 4	Y (GFP)	Gissot et al., 2006; Bitrián et al., 2011	53 / 43	9																									6 (6)		8 (8)		7 (7)				10 (10)						3 (3)		6 (6)
	SNF4	AT1G09020	Sucrose Nonfermenting 4																													130		209		142				241						91		135
CDPKs	CPK3 / CDPK6	AT4G23650	Calcium-dependent protein kinase 3, Calcium-dependent protein kinase 6	Y (GFP)	Dammann et al., 2003; Mehlmer and Wurzinger et al., 2010; Berendzen et al., 2012	59	3
	CPK3 / CDPK6	AT4G23650	Calcium-dependent protein kinase 3, Calcium-dependent protein kinase 6
	CPK5	AT4G35310	Calcium-dependent protein kinase 5	Y (GFP)	Boudsocq et al., 2010	63	1
	CPK5	AT4G35310	Calcium-dependent protein kinase 5
	CPK4	AT4G09570	Calcium-dependent protein kinase 4	Y (GFP)	Dammann et al., 2003; Zhu et al., 2007; Boudsocq et al., 2010	56	2 / 0
	CPK4	AT4G09570	Calcium-dependent protein kinase 4
	CPK11 / CDPK2	AT1G35670	Calcium-dependent protein kinase 11, Calcium-dependent protein kinase 2	Y (GFP)	Rodriguez et al., 2006; Zhu et al., 2007; Boudsocq et al., 2010	56	2 / 0
	CPK11 / CDPK2	AT1G35670	Calcium-dependent protein kinase 11, Calcium-dependent protein kinase 2
	CPK9	AT3G20410	Calcium-dependent protein kinase 9	N		60	1
	CPK9	AT3G20410	Calcium-dependent protein kinase 9
CKII	CKA1	AT5G67380	Casein Kinase II alpha chain 1	Y (GFP)	Salinas et al., 2006	48 / 44	8 / 7			3 (1)		6 (4)		8 (3)		14 (4)						2 (0)				8 (4)		5 (3)
	CKA1	AT5G67380	Casein Kinase II alpha chain 1							60		193		165		364						77				170		117
	CKA2	AT3G50000	Casein Kinase II alpha chain 2	Y (GFP)	Salinas et al., 2006	47	10 / 9			5 (3)		5 (3)		8 (3)		15 (5)						2 (0)		5 (3)		8 (4)		3 (1)
	CKA2	AT3G50000	Casein Kinase II alpha chain 2							95		143		189		411						77		193		230		105
	CKAcp	AT2G23070	Casein Kinase II chloroplastidic alpha chain	N		50	7							3 (1)		6 (4)		5 (3)		1 (1)								4 (2)
	CKAcp	AT2G23070	Casein Kinase II chloroplastidic alpha chain											88		181		170		61								142
	CKB1	AT5G47080	Casein Kinase II beta chain 1	Y (GFP)	Salinas et al., 2006; Park et al., 2008	32 / 29 / 28 / 32	7			3 (3)		3 (1)		5 (4)		4 (4)		4 (4)								4 (3)		6 (5)
	CKB1	AT5G47080	Casein Kinase II alpha chain 1							50		60		70		121		156								104		149
other kinases	CKL2	AT1G72710	Casein kinase I-like protein 2	Y (GFP)	Lee et al., 2005	52	2																																							18 (11)		18 (8)
	CKL2	AT1G72710	Casein kinase I-like protein 2																																											563		328
	MPK16	AT5G19010	Mitogen-activated protein kinase 16	?		65	1																																									3 (1)
	MPK16	AT5G19010	Mitogen-activated protein kinase 16																																													72
	CDKC2	AT5G64960	Cyclin dependent kinase group C2, Cyclin-dependent kinase C2	Y (GFP)	Koroleva et al., 2005; Kitsios et al., 2008	57 / 51	1 / 0																																			1 (0)
	CDKC2	AT5G64960	Cyclin dependent kinase group C2, Cyclin-dependent kinase C2																																							80
	CDKC1	AT5G10270	Cyclin dependent kinase group C1, Cyclin-dependent kinase C1	Y (GFP)	Boruc et al., 2010	57	1 / 0																																			1 (0)
	CDKC1	AT5G10270	Cyclin dependent kinase group C1, Cyclin-dependent kinase C1			57																																				80
	CRK9, EP1	AT4G23170	Cysteine-Rich RLK (Receptor-Like Protein Kinase) 9	?		30	1	1 (1)
	CRK9, EP1	AT4G23170	Cysteine-Rich RLK (Receptor-Like Protein Kinase) 9					53
	?	AT3G13670	Protein kinase family protein	?		79	2 / 1																															2 (2)						1 (1 )
	?	AT3G13670	Protein kinase family protein																																			70						59
	CSK	AT1G67840	Chloroplast sensor kinase	N?		67 / 49	1
	CSK	AT1G67840	Chloroplast sensor kinase
	?	AT2G28990	Putative leucine-rich repeat protein kinase	?		99	1
	?	AT2G28990	Putative leucine-rich repeat protein kinase
	CRCK3	AT2G11520	Calmodulin-binding receptor-like cytoplasmickinase 3	?		57	1
	CRCK3	AT2G11520	Calmodulin-binding receptor-like cytoplasmickinase 3
	CERK1 / LYK1 / LYSM RLK1	AT3G21630	Chitin elicitor receptor kinase 1, LYSM domain receptor-like kinase 1, LYSM-containing receptor-like kinase 1	?		67	1
	CERK1 / LYK1 / LYSM RLK1	AT3G21630	Chitin elicitor receptor kinase 1, LYSM domain receptor-like kinase 1, LYSM-containing receptor-like kinase 1
	?	AT1G09600	Protein kinase family protein	?		80	1													1 (1?)
	?	AT1G09600	Protein kinase family protein																	43
	?	AT1G51805	Putative protein kinase	?		98 / 96	1
	?	AT1G51805	Putative protein kinase
	MPK?		Mitogen-activated protein kinase?	?		?	1 / 0
	MPK?		Mitogen-activated protein kinase?
[truncated: 22 more columns]

## Sheet: SnRK1 peptides
AKIN10 (AT3G01090)						AKIN11 (AT3G29160)						SNF4 (AKINbg) (AT1G09020)						AKINbeta2 (AT4G16360)
date	sample	peptides	peptides	proteotypic?		date	sample	peptides	peptides	proteotypic?		date	sample	peptides	peptides	proteotypic?		date	sample	peptides	peptides	proteotypic?
2008-10-21	8	K.YLLDLQR.V	YLLDLQR	Y		2008-10-21	8	K.YLLDIQR.V	YLLDIQR	Y (only splicing form 1 and 2)		2008-10-21	7	R.VFLSGSFTR.W	VFLSGSFTR	Y		2008-10-21	5	R.FIVDGQWR.H	FIVDGQWR	Y
		K.IAEHALTGHK.V	IAEHALTGHK	Y				R.NQVLESLR.N	NQVLESLR	Y				R.MSGVDLELSR.H	MSGVDLELSR	Y				K.SGPSVVALGSTHR.F	SGPSVVALGSTHR	Y
		R.LFMHPHIIR.L	LFMHPHIIR	N (AKIN10 and AKIN11)				R.LFMHPHIIR.Q	LFMHPHIIR	N (AKIN10 and AKIN11)				K.VIALDVNLPVK.Q	VIALDVNLPVK	Y
		K.IADFGLSNIMR.D	IADFGLSNIMR	Y				K.IADFGLSNVMR.D	IADFGLSNVMR	Y				R.TAYELLPESGK.V	TAYELLPESGK	Y
		R.DLKPENLLLDSK.C	DLKPENLLLDSK	Y				K.SGELFDYIVEK.G	SGELFDYIVEK	Y				R.SNMDVDDVFLR.T	SNMDVDDVFLR	Y
	9	R.TLGIGSFGR.V	TLGIGSFGR	Y				R.DLKPENLLLDSR.C	DLKPENLLLDSR	Y				R.GNSAASGQLLTPTR.F	GNSAASGQLLTPTR	Y
		K.YLLDLQR.V	YLLDLQR	Y				R.YLAVSPPDTVEQAK.K	YLAVSPPDTVEQAK	Y			8	R.VFLSGSFTR.W	VFLSGSFTR	Y
		K.FEIQLYK.T	FEIQLYK	N (AKIN10 and AKIN12)				K.GGIYTLPSHLSSEAR.D	GGIYTLPSHLSSEAR	Y				R.RLVIVEAGSK.R	RLVIVEAGSK	Y
		K.KIGHYNMK.C	KIGHYNMK	N (AKIN10 and AKIN11 [not splicing form3])			9	K.YLLDIQR.V	YLLDIQR	Y (only splicing form 1 and 2)				R.MSGVDLELSR.H	MSGVDLELSR	Y
		K.IAEHALTGHK.V	IAEHALTGHK	Y				K.FELQLYK.A	FELQLYK	Y (only splicing form 1 and 2)				R.RVFLSGSFTR.W	RVFLSGSFTR	Y
		R.LFMHPHIIR.L	LFMHPHIIR	N (AKIN10 and AKIN11)				K.KIGHYNMK.C	KIGHYNMK	N (AKIN10 and AKIN11 [not splicing form3])				K.VIALDVNLPVK.Q	VIALDVNLPVK	Y
		R.SGVESILPNYK.L	SGVESILPNYK	Y				R.WFQTHLPR.Y	WFQTHLPR	Y				R.TAYELLPESGK.V	TAYELLPESGK	Y
		K.IADFGLSNIMR.D	IADFGLSNIMR	Y				R.LFMHPHIIR.Q	LFMHPHIIR	N (AKIN10 and AKIN11)				R.SNMDVDDVFLR.T	SNMDVDDVFLR	Y
		R.DDKYLLDLQR.V	DDKYLLDLQR	Y				K.IADFGLSNVMR.D	IADFGLSNVMR	Y				R.GNSAASGQLLTPTR.F	GNSAASGQLLTPTR	Y
		R.DLKPENLLLDSK.C	DLKPENLLLDSK	Y				K.ALQELNVCWK.K	ALQELNVCWK	Y (only splicing form 1 and 2)			9	R.VFLSGSFTR.W	VFLSGSFTR	Y
		R.LPGLMEYQGVGLR.S	LPGLMEYQGVGLR	Y				K.SGELFDYIVEK.G	SGELFDYIVEK	Y				R.RLVIVEAGSK.R	RLVIVEAGSK	Y
		R.MHPAESVASPVSHR.L	MHPAESVASPVSHR	Y				R.DLKPENLLLDSR.C	DLKPENLLLDSR	Y				R.MSGVDLELSR.H	MSGVDLELSR	Y
		K.GGIYTLPSHLSPGAR.D	GGIYTLPSHLSPGAR	Y				R.YLAVSPPDTVEQAK.K	YLAVSPPDTVEQAK	Y				K.VIALDVNLPVK.Q	VIALDVNLPVK	Y
	10	R.TLGIGSFGR.V	TLGIGSFGR	Y				R.FGNNGVESILPNYK.L	FGNNGVESILPNYK	Y				R.SNMDVDDVFLR.T	SNMDVDDVFLR	Y
		K.IADFGLSNIMR.D	IADFGLSNIMR	Y			6C	K.YLLDIQR.V	YLLDIQR	Y (only splicing form 1 and 2)				R.GNSAASGQLLTPTR.F	GNSAASGQLLTPTR	Y
		R.LPGLMEYQGVGLR.S	LPGLMEYQGVGLR	Y				R.LFMHPHIIR.Q	LFMHPHIIR	N (AKIN10 and AKIN11)				R.MSGVDLELSRHR.I	MSGVDLELSRHR	Y
		K.GGIYTLPSHLSPGAR.D	GGIYTLPSHLSPGAR	Y				K.IADFGLSNVMR.D	IADFGLSNVMR	Y			5C	R.LVIVEAGSK.R	LVIVEAGSK	Y
	6C	R.TLGIGSFGR.V	TLGIGSFGR	Y				K.SGELFDYIVEK.G	SGELFDYIVEK	Y				R.VFLSGSFTR.W	VFLSGSFTR	Y
		K.YLLDLQR.V	YLLDLQR	Y				R.DLKPENLLLDSR.C	DLKPENLLLDSR	Y				R.RLVIVEAGSK.R	RLVIVEAGSK	Y
		K.IAEHALTGHK.V	IAEHALTGHK	Y				R.YLAVSPPDTVEQAK.K	YLAVSPPDTVEQAK	Y				R.MSGVDLELSR.H	MSGVDLELSR	Y
		R.LFMHPHIIR.L	LFMHPHIIR	N (AKIN10 and AKIN11)			B	K.YLLDIQR.V	YLLDIQR	Y (only splicing form 1 and 2)				R.RVFLSGSFTR.W	RVFLSGSFTR	Y
		R.SGVESILPNYK.L	SGVESILPNYK	Y				R.EIMNEVLK.A	EIMNEVLK	Y (only splicing form 1 and 2)				R.TADPSQEAVPR.M	TADPSQEAVPR	Y
		K.IADFGLSNIMR.D	IADFGLSNIMR	Y				R.WFQTHLPR.Y	WFQTHLPR	Y				K.VIALDVNLPVK.Q	VIALDVNLPVK	Y
		R.DLKPENLLLDSK.C	DLKPENLLLDSK	Y				K.IAEHVVTGHK.V	IAEHVVTGHK	Y				R.TAYELLPESGK.V	TAYELLPESGK	Y
		R.MHPAESVASPVSHR.L	MHPAESVASPVSHR	Y				R.LFMHPHIIR.Q	LFMHPHIIR	N (AKIN10 and AKIN11)				R.SNMDVDDVFLR.T	SNMDVDDVFLR	Y
	7C	K.IAEHALTGHK.V	IAEHALTGHK	Y				K.IADFGLSNVMR.D	IADFGLSNVMR	Y				R.GNSAASGQLLTPTR.F	GNSAASGQLLTPTR	Y
	B	K.YLLDLQR.V	YLLDLQR	Y				K.SGELFDYIVEK.G	SGELFDYIVEK	Y			A	R.MSGVDLELSR.H	MSGVDLELSR	Y
		K.IAEHALTGHK.V	IAEHALTGHK	Y				R.DLKPENLLLDSR.C	DLKPENLLLDSR	Y				R.TADPSQEAVPR.M	TADPSQEAVPR	Y
		R.LFMHPHIIR.L	LFMHPHIIR	N (AKIN10 and AKIN11)				R.YLAVSPPDTVEQAK.K	YLAVSPPDTVEQAK	Y				K.VIALDVNLPVK.Q	VIALDVNLPVK	Y
		K.IADFGLSNIMR.D	IADFGLSNIMR	Y				R.FGNNGVESILPNYK.L	FGNNGVESILPNYK	Y			B	R.VFLSGSFTR.W	VFLSGSFTR	Y
		R.LPGLMEYQGVGLR.S	LPGLMEYQGVGLR	Y				K.GGIYTLPSHLSSEAR.D	GGIYTLPSHLSSEAR	Y				R.RLVIVEAGSK.R	RLVIVEAGSK	Y
		K.GGIYTLPSHLSPGAR.D	GGIYTLPSHLSPGAR	Y			C	R.REIKILR.L	REIKILR	N (in AKIN10, AKIN11 and AKIN12)				R.MSGVDLELSR.H	MSGVDLELSR	Y
	C	R.REIKILR.L	REIKILR	N (in AKIN10, AKIN11 and AKIN12)				K.FELQLYK.A	FELQLYK	Y (only splicing form 1 and 2)				K.VIALDVNLPVK.Q	VIALDVNLPVK	Y
		K.FEIQLYK.T	FEIQLYK	N (AKIN10 and AKIN12)				R.NQVLESLR.N	NQVLESLR	Y				R.TAYELLPESGK.V	TAYELLPESGK	Y
		K.IAEHALTGHK.V	IAEHALTGHK	Y				R.MLIVDPVKR.I	MLIVDPVKR	Y				R.SNMDVDDVFLR.T	SNMDVDDVFLR	Y
		R.LFMHPHIIR.L	LFMHPHIIR	N (AKIN10 and AKIN11)				R.WFQTHLPR.Y	WFQTHLPR	Y			C	R.RLVIVEAGSK.R	RLVIVEAGSK	Y
		K.IADFGLSNIMR.D	IADFGLSNIMR	Y				K.IAEHVVTGHK.V	IAEHVVTGHK	Y				R.MSGVDLELSR.H	MSGVDLELSR	Y
		K.ALQDLNVCWK.K	ALQDLNVCWK	Y				R.LFMHPHIIR.Q	LFMHPHIIR	N (AKIN10 and AKIN11)				R.TADPSQEAVPR.M	TADPSQEAVPR	Y
		R.DDKYLLDLQR.V	DDKYLLDLQR	Y				K.IADFGLSNVMR.D	IADFGLSNVMR	Y				K.VIALDVNLPVK.Q	VIALDVNLPVK	Y
		R.LPGLMEYQGVGLR.S	LPGLMEYQGVGLR	Y				K.SGELFDYIVEK.G	SGELFDYIVEK	Y				R.TAYELLPESGK.V	TAYELLPESGK	Y
		R.MHPAESVASPVSHR.L	MHPAESVASPVSHR	Y				R.FGNNGVESILPNYK.L	FGNNGVESILPNYK	Y				R.SNMDVDDVFLR.T	SNMDVDDVFLR	Y
		K.GGIYTLPSHLSPGAR.D	GGIYTLPSHLSPGAR	Y				K.GGIYTLPSHLSSEAR.D	GGIYTLPSHLSSEAR	Y		2008-12-17	RC1	K.VIALDVNLPVK.Q	VIALDVNLPVK	Y
		K.IKGGIYTLPSHLSPGAR.D	IKGGIYTLPSHLSPGAR	Y		2008-12-17	RC1	K.SGELFDYIVEK.G	SGELFDYIVEK	N (in AKIN10, AKIN11 and AKIN12)			RB7	R.LVIVEAGSK.R	LVIVEAGSK	Y
		R.TQNDGTVTYYLILDNR.F	TQNDGTVTYYLILDNR	Y			RB4	K.IAEHVVTGHK.V	IAEHVVTGHK	Y				R.MSGVDLELSR.H	MSGVDLELSR	Y
2008-12-17	RB2	R.TLGIGSFGR.V	TLGIGSFGR	Y			RB7	K.IADFGLSNVMR.D	IADFGLSNVMR	Y				R.TADPSQEAVPR.M	TADPSQEAVPR	Y
		K.IAEHALTGHK.V	IAEHALTGHK	Y										R.SNMDVDDVFLR.T	SNMDVDDVFLR	Y
		R.MHPAESVASPVSHR.L	MHPAESVASPVSHR	Y
	RB7	K.IAEHALTGHK.V	IAEHALTGHK	Y

## Sheet: CDPK peptides
CPK3 (AT4G23650)						CPK5 (AT4G35310)						CPK4 (AT4G09570)/CPK11 (AT1G35670)						CPK9 (At3g20410)
date	sample	peptides	peptides	proteotypic?		date	sample	peptides	peptides	proteotypic?		date	sample	peptides	peptides	proteotypic?		date	sample	peptides	peptides	proteotypic?
2008-12-17	RC1	R.GQFGVTYLVTHK.E	GQFGVTYLVTHK	Y		2008-12-17	RC2	R.LTAHEVLR.H	LTAHEVLR	N (CPK5 and CPK6)		2008-12-17	RC2	R.LRDHYLLGK.K	LRDHYLLGK	N (CPK4 and CPK11)		2008-12-17	RC2	K.SNSILENAFEDVK.L	SNSILENAFEDVK	Y
		R.DLKPENFLFLSK.D	DLKPENFLFLSK	Y				R.ALDPAVLSR.L	ALDPAVLSR	N (CPK5, CPK6 and CPK26)				R.VGSELMESEIK.S	VGSELMESEIK	N (CPK4 and CPK11)
		R.EVQIMHHLSGHR.N	EVQIMHHLSGHR	Y				R.DLKPENFLLVNK.D	DLKPENFLLVNK	N (CPK5, CPK6 and CPK26)			RB4	R.LRDHYLLGK.K	LRDHYLLGK	N (CPK4 and CPK11)
		R.GSSGSGTVGSSGSGTGGSR.S	GSSGSGTVGSSGSGTGGSR	Y				K.LISKEDVEDVRR.E	LISKEDVEDVRR	N (CPK5, CPK6 and CPK26 [only splicing form 2])				R.VGSELMESEIK.S	VGSELMESEIK	N (CPK4 and CPK11)
		R.EDGEASDKPLDNAVLSR.M	EDGEASDKPLDNAVLSR	Y				R.NPDNQAYYVLGHK.T	NPDNQAYYVLGHK	Y
	RC2	R.GQFGVTYLVTHK.E	GQFGVTYLVTHK	Y				K.VIAESLSEEEIAGLR.E	VIAESLSEEEIAGLR	N (CPK5 and CPK6)
		R.DLKPENFLFLSK.D	DLKPENFLFLSK	Y				R.RNPDNQAYYVLGHK.T	RNPDNQAYYVLGHK	Y
		K.EIIAEVDTDRDGK.I	EIIAEVDTDRDGK	Y				R.EIQIMHHLAGHGSIVTIK.G	EIQIMHHLAGHGSIVTIK	Y
		R.EVQIMHHLSGHR.N	EVQIMHHLSGHR	Y
		R.LVHKDDIEDVRR.E	LVHKDDIEDVRR	Y
		R.EDGEASDKPLDNAVLSR.M	EDGEASDKPLDNAVLSR	Y
	RB4	R.GQFGVTYLVTHK.E	GQFGVTYLVTHK	Y
		R.EVQIMHHLSGHR.N	EVQIMHHLSGHR	Y
		R.LVHKDDIEDVRR.E	LVHKDDIEDVRR	Y
		R.GSSGSGTVGSSGSGTGGSR.S	GSSGSGTVGSSGSGTGGSR	Y
		R.RGSSGSGTVGSSGSGTGGSR.S	RGSSGSGTVGSSGSGTGGSR	Y
		R.EDGEASDKPLDNAVLSR.M	EDGEASDKPLDNAVLSR	Y
		K.SSDPPPSSSSSSSGNVVHHVKPAGER.R	SSDPPPSSSSSSSGNVVHHVKPAGER	Y

## Sheet: CKII peptides
CKA1 (AT5G67380)						CKA2 (AT3G50000)						CKAcp (AT2G23070)						CKB1 (AT5G47080)
date	sample	peptides	peptides	proteotypic?		date	sample	peptides	peptides	proteotypic?		date	sample	peptides	peptides	proteotypic?		date	sample	peptides	peptides	proteotypic?	spling forms
2008-08-27	4	K.EAMAHAYFAQVR.A	EAMAHAYFAQVR	Y		2008-08-27	4	K.FINADNR.H	FINADNR	Y		2008-08-27	6	R.VYADVNVVRPK.D	VYADVNVVRPK	Y		2008-08-27	4	K.ATQNYVQR.V	ATQNYVQR	Y	1, 4
		K.ILQNLCGGPNIVK.L	ILQNLCGGPNIVK	N (in all 4 CKA)				R.VYTDVNVIRPK.D	VYTDVNVIRPK	Y				K.ILQNLCGGPNIVK.L	ILQNLCGGPNIVK	N (in all 4 CKA)				K.GTVTAATTTANLIGK.Q	GTVTAATTTANLIGK	Y
		R.DVKPHNVMIDHELR.K	DVKPHNVMIDHELR	N (in CKA1 and CKA2)				K.EAMAHPYFAQVR.A	EAMAHPYFAQVR	Y				K.VLGTDELNAYLNK.Y	VLGTDELNAYLNK	N (in CKA1, CKA2 and CKAcp)				K.GKGTVTAATTTANLIGK.Q	GKGTVTAATTTANLIGK	Y
	5	R.VYTEVNVIRPK.D	VYTEVNVIRPK	Y				K.ILQNLCGGPNIVK.L	ILQNLCGGPNIVK	N (in all 4 CKA)			7	R.VYADVNVVRPK.D	VYADVNVVRPK	Y			5	K.NYDFGR.C	NYDFGR	N (CKB1, CKB2 and CK4)
		K.EAMAHAYFAQVR.A	EAMAHAYFAQVR	Y				R.DVKPHNVMIDHELR.K	DVKPHNVMIDHELR	N (in CKA1 and CKA2)				K.TPSLIFEHVNNK.D	TPSLIFEHVNNK	Y				K.ATQNYVQR.V	ATQNYVQR	Y	1, 4
		K.ILQNLCGGPNIVK.L	ILQNLCGGPNIVK	N (in all 4 CKA)			5	R.VYTDVNVIRPK.D	VYTDVNVIRPK	Y				K.ILQNLCGGPNIVK.L	ILQNLCGGPNIVK	N (in all 4 CKA)				K.CEDIYYPR.S	CEDIYYPR	N (CKB1 and CKB4)
		K.YSEVFEGINVNSK.E	YSEVFEGINVNSK	Y (only splicing form 1)				K.EAMAHPYFAQVR.A	EAMAHPYFAQVR	Y				K.VLYPTLSDYDVR.Y	VLYPTLSDYDVR	Y			6	K.ATQNYVQR.V	ATQNYVQR	Y
		K.EPFFYGHDNQDQLVK.I	EPFFYGHDNQDQLVK	N (in CKA1 and CKA2)				K.ILQNLCGGPNIVK.L	ILQNLCGGPNIVK	N (in all 4 CKA)				K.VLGTDELNAYLNK.Y	VLGTDELNAYLNK	N (in CKA1, CKA2 and CKAcp)				K.CEDIYYPR.S	CEDIYYPR	N (CKB1 and CKB4)
		R.AMSKARVYTEVNVIRPK.D	AMSKARVYTEVNVIRPK	Y				R.HLVSPEAIDYLDK.L	HLVSPEAIDYLDK	Y				R.DVKPHNVMIDHEQR.K	DVKPHNVMIDHEQR	Y				K.GTVTAATTTANLIGK.Q	GTVTAATTTANLIGK	Y
	6	K.LLDVVRDQHSK.T	LLDVVRDQHSK	N (in CKA1 and CKA2)				K.EPFFYGHDNQDQLVK.I	EPFFYGHDNQDQLVK	N (in CKA1 and CKA2)			8	R.VYADVNVVRPK.D	VYADVNVVRPK	Y				R.INDALERPSPSTSR.Q	INDALERPSPSTSR	Y
		R.VYTEVNVIRPK.D	VYTEVNVIRPK	Y			6	R.VYTDVNVIRPK.D	VYTDVNVIRPK	Y				K.TPSLIFEHVNNK.D	TPSLIFEHVNNK	Y				K.GKGTVTAATTTANLIGK.Q	GKGTVTAATTTANLIGK	Y
		K.EAMAHAYFAQVR.A	EAMAHAYFAQVR	Y				K.LLDVVRDQHSK.T	LLDVVRDQHSK	N (in CKA1 and CKA2)				K.ILQNLCGGPNIVK.L	ILQNLCGGPNIVK	N (in all 4 CKA)			7	K.ATQNYVQR.V	ATQNYVQR	Y	1, 4
		K.ILQNLCGGPNIVK.L	ILQNLCGGPNIVK	N (in all 4 CKA)				K.EAMAHPYFAQVR.A	EAMAHPYFAQVR	Y				K.VLGTDELNAYLNK.Y	VLGTDELNAYLNK	N (in CKA1, CKA2 and CKAcp)				K.GTVTAATTTANLIGK.Q	GTVTAATTTANLIGK	Y
		K.VLGTDELNAYLNK.Y	VLGTDELNAYLNK	N (in CKA1, CKA2 and CKAcp)				K.ILQNLCGGPNIVK.L	ILQNLCGGPNIVK	N (in all 4 CKA)				R.DVKPHNVMIDHEQR.K	DVKPHNVMIDHEQR	Y				R.INDALERPSPSTSR.Q	INDALERPSPSTSR	Y
		K.YSEVFEGINVNSK.E	YSEVFEGINVNSK	Y (only splicing form 1)				K.VLGTDELNAYLNK.Y	VLGTDELNAYLNK	N (in CKA1, CKA2 and CKAcp)			9	R.VYADVNVVRPK.D	VYADVNVVRPK	Y				K.GKGTVTAATTTANLIGK.Q	GKGTVTAATTTANLIGK	Y
		K.EPFFYGHDNQDQLVK.I	EPFFYGHDNQDQLVK	N (in CKA1 and CKA2)				K.EPFFYGHDNQDQLVK.I	EPFFYGHDNQDQLVK	N (in CKA1 and CKA2)		2008-10-21	3C	R.VYADVNVVRPK.D	VYADVNVVRPK	Y			8	K.ATQNYVQR.V	ATQNYVQR	Y	1, 4
		R.KEPFFYGHDNQDQLVK.I	KEPFFYGHDNQDQLVK	N (in CKA1 and CKA2)				R.KEPFFYGHDNQDQLVK.I	KEPFFYGHDNQDQLVK	N (in CKA1 and CKA2)				K.TPSLIFEHVNNK.D	TPSLIFEHVNNK	Y				K.GTVTAATTTANLIGK.Q	GTVTAATTTANLIGK	Y
	7	R.YYIYELLK.A	YYIYELLK	N (in CKA1 and CKA2)				R.GKYSEVFEGINMNNNEK.C	GKYSEVFEGINMNNNEK	Y				K.ILQNLCGGPNIVK.L	ILQNLCGGPNIVK	N (in all 4 CKA)				R.INDALERPSPSTSR.Q	INDALERPSPSTSR	Y
		R.YDHQDRLTAK.E	YDHQDRLTAK	N (in CKA1 and CKA2)			7	R.YYIYELLK.A	YYIYELLK	N (in CKA1 and CKA2)				K.VLGTDELNAYLNK.Y	VLGTDELNAYLNK	N (in CKA1, CKA2 and CKAcp)				K.GKGTVTAATTTANLIGK.Q	GKGTVTAATTTANLIGK	Y
		K.LLDVVRDQHSK.T	LLDVVRDQHSK	N (in CKA1 and CKA2)				R.YDHQDRLTAK.E	YDHQDRLTAK	N (in CKA1 and CKA2)		2008-12-17	RB8	R.YDHQERPTAK.E	YDHQERPTAK	Y		2008-10-21	2C	K.CEDIYYPR.S	CEDIYYPR	N (CKB1 and CKB4)
		R.VYTEVNVIRPK.D	VYTEVNVIRPK	Y				R.VYTDVNVIRPK.D	VYTDVNVIRPK	Y				R.VYADVNVVRPK.D	VYADVNVVRPK	Y				K.GTVTAATTTANLIGK.Q	GTVTAATTTANLIGK	Y
		K.EAMAHAYFAQVR.A	EAMAHAYFAQVR	Y				K.LLDVVRDQHSK.T	LLDVVRDQHSK	N (in CKA1 and CKA2)				K.TPSLIFEHVNNK.D	TPSLIFEHVNNK	Y				R.INDALERPSPSTSR.Q	INDALERPSPSTSR	Y
		K.ILQNLCGGPNIVK.L	ILQNLCGGPNIVK	N (in all 4 CKA)				K.EAMAHPYFAQVR.A	EAMAHPYFAQVR	Y				K.ILQNLCGGPNIVK.L	ILQNLCGGPNIVK	N (in all 4 CKA)				K.GKGTVTAATTTANLIGK.Q	GKGTVTAATTTANLIGK	Y
		K.VLGTDELNAYLNK.Y	VLGTDELNAYLNK	N (in CKA1, CKA2 and CKAcp)				K.ILQNLCGGPNIVK.L	ILQNLCGGPNIVK	N (in all 4 CKA)				K.VLGTDELNAYLNK.Y	VLGTDELNAYLNK	N (in CKA1, CKA2 and CKAcp)			3C	K.ATQNYVQR.V	ATQNYVQR	Y	1, 4
		K.VLYPTLTDYDIR.Y	VLYPTLTDYDIR	N (in CKA1, CKA2 and CKA3)				K.VLGTDELNAYLNK.Y	VLGTDELNAYLNK	N (in CKA1, CKA2 and CKAcp)				R.DVKPHNVMIDHEQR.K	DVKPHNVMIDHEQR	Y				K.CEDIYYPR.S	CEDIYYPR	N (CKB1 and CKB4)
		K.ALDFCHSQGIMHR.D	ALDFCHSQGIMHR	N (in CKA1, CKA2 and CKA3)				K.VLYPTLTDYDIR.Y	VLYPTLTDYDIR	N (in CKA1, CKA2 and CKA3)			RB11	K.ALDFCHSR.G	ALDFCHSR	Y				K.GTVTAATTTANLIGK.Q	GTVTAATTTANLIGK	Y
		R.GKYSEVFEGINVNSK.E	GKYSEVFEGINVNSK	Y (only splicing form 1)				R.HLVSPEAIDYLDK.L	HLVSPEAIDYLDK	Y				R.YDHQERPTAK.E	YDHQERPTAK	Y				R.INDALERPSPSTSR.Q	INDALERPSPSTSR	Y
		R.DVKPHNVMIDHELR.K	DVKPHNVMIDHELR	N (in CKA1 and CKA2)				K.ALDFCHSQGIMHR.D	ALDFCHSQGIMHR	N (in CKA1, CKA2 and CKA3)				R.VYADVNVVRPK.D	VYADVNVVRPK	Y				K.GKGTVTAATTTANLIGK.Q	GKGTVTAATTTANLIGK	Y
		K.EPFFYGHDNQDQLVK.I	EPFFYGHDNQDQLVK	N (in CKA1 and CKA2)				R.DVKPHNVMIDHELR.K	DVKPHNVMIDHELR	N (in CKA1 and CKA2)				K.TPSLIFEHVNNK.D	TPSLIFEHVNNK	Y				R.QVNGKGKGTVTAATTTANLIGK.Q	QVNGKGKGTVTAATTTANLIGK	Y
		R.KEPFFYGHDNQDQLVK.I	KEPFFYGHDNQDQLVK	N (in CKA1 and CKA2)				K.YSEVFEGINMNNNEK.C	YSEVFEGINMNNNEK	Y				K.ILQNLCGGPNIVK.L	ILQNLCGGPNIVK	N (in all 4 CKA)
		R.AMSKARVYTEVNVIRPK.D	AMSKARVYTEVNVIRPK	Y				K.EPFFYGHDNQDQLVK.I	EPFFYGHDNQDQLVK	N (in CKA1 and CKA2)				K.VLYPTLSDYDVR.Y	VLYPTLSDYDVR	Y
2008-10-21	3	K.ILQNLCGGPNIVK.L	ILQNLCGGPNIVK	N (in all 4 CKA)				R.KEPFFYGHDNQDQLVK.I	KEPFFYGHDNQDQLVK	N (in CKA1 and CKA2)				K.VLGTDELNAYLNK.Y	VLGTDELNAYLNK	N (in CKA1, CKA2 and CKAcp)
		K.VLGTDELNAYLNK.Y	VLGTDELNAYLNK	N (in CKA1, CKA2 and CKAcp)				R.GKYSEVFEGINMNNNEK.C	GKYSEVFEGINMNNNEK	Y				R.DVKPHNVMIDHEQR.K	DVKPHNVMIDHEQR	Y
	2C	R.VYTEVNVIRPK.D	VYTEVNVIRPK	Y		2008-10-21	3	K.ILQNLCGGPNIVK.L	ILQNLCGGPNIVK	N (in all 4 CKA)				K.YSEVFEGIHATDNEK.C	YSEVFEGIHATDNEK	Y
		K.EAMAHAYFAQVR.A	EAMAHAYFAQVR	Y				K.VLGTDELNAYLNK.Y	VLGTDELNAYLNK	N (in CKA1, CKA2 and CKAcp)
		K.ILQNLCGGPNIVK.L	ILQNLCGGPNIVK	N (in all 4 CKA)			4	R.VYTDVNVIRPK.D	VYTDVNVIRPK	Y
		K.VLGTDELNAYLNK.Y	VLGTDELNAYLNK	N (in CKA1, CKA2 and CKAcp)				K.ILQNLCGGPNIVK.L	ILQNLCGGPNIVK	N (in all 4 CKA)
		K.YSEVFEGINVNSK.E	YSEVFEGINVNSK	Y (only splicing form 1)				K.EAMAHPYFAQVR.A	EAMAHPYFAQVR	Y
		K.ALDFCHSQGIMHR.D	ALDFCHSQGIMHR	N (in CKA1, CKA2 and CKA3)				K.VLGTDELNAYLNK.Y	VLGTDELNAYLNK	N (in CKA1, CKA2 and CKAcp)
		R.DVKPHNVMIDHELR.K	DVKPHNVMIDHELR	N (in CKA1 and CKA2)				R.HLVSPEAIDYLDK.L	HLVSPEAIDYLDK	Y
		R.AMSKARVYTEVNVIRPK.D	AMSKARVYTEVNVIRPK	Y			2C	R.VYTDVNVIRPK.D	VYTDVNVIRPK	Y
	3C	R.VYTEVNVIRPK.D	VYTEVNVIRPK	Y				K.ILQNLCGGPNIVK.L	ILQNLCGGPNIVK	N (in all 4 CKA)
		K.EAMAHAYFAQVR.A	EAMAHAYFAQVR	Y				K.EAMAHPYFAQVR.A	EAMAHPYFAQVR	Y
		K.ILQNLCGGPNIVK.L	ILQNLCGGPNIVK	N (in all 4 CKA)				K.VLGTDELNAYLNK.Y	VLGTDELNAYLNK	N (in CKA1, CKA2 and CKAcp)
		K.VLGTDELNAYLNK.Y	VLGTDELNAYLNK	N (in CKA1, CKA2 and CKAcp)				R.HLVSPEAIDYLDK.L	HLVSPEAIDYLDK	Y
		R.AMSKARVYTEVNVIRPK.D	AMSKARVYTEVNVIRPK	Y				K.ALDFCHSQGIMHR.D	ALDFCHSQGIMHR	N (in CKA1, CKA2 and CKA3)
2008-12-17	RB11	R.VYTEVNVIRPK.D	VYTEVNVIRPK	Y				R.DVKPHNVMIDHELR.K	DVKPHNVMIDHELR	N (in CKA1 and CKA2)
		K.EAMAHAYFAQVR.A	EAMAHAYFAQVR	Y				K.YSEVFEGINMNNNEK.C	YSEVFEGINMNNNEK	Y
		K.ILQNLCGGPNIVK.L	ILQNLCGGPNIVK	N (in all 4 CKA)			3C	R.VYTDVNVIRPK.D	VYTDVNVIRPK	Y
		K.VLGTDELNAYLNK.Y	VLGTDELNAYLNK	N (in CKA1, CKA2 and CKAcp)				K.ILQNLCGGPNIVK.L	ILQNLCGGPNIVK	N (in all 4 CKA)
		K.ALDFCHSQGIMHR.D	ALDFCHSQGIMHR	N (in CKA1, CKA2 and CKA3)				K.VLGTDELNAYLNK.Y	VLGTDELNAYLNK	N (in CKA1, CKA2 and CKAcp)
		R.DVKPHNVMIDHELR.K	DVKPHNVMIDHELR	N (in CKA1 and CKA2)		2008-12-17	RB8	R.VYTDVNVIRPK.D	VYTDVNVIRPK	Y
		K.EPFFYGHDNQDQLVK.I	EPFFYGHDNQDQLVK	N (in CKA1 and CKA2)				K.ILQNLCGGPNIVK.L	ILQNLCGGPNIVK	N (in all 4 CKA)
		R.DVKPHNVMIDHELRK.L	DVKPHNVMIDHELRK	N (in CKA1 and CKA2)				K.VLGTDELNAYLNK.Y	VLGTDELNAYLNK	N (in CKA1, CKA2 and CKAcp)
		R.KEPFFYGHDNQDQLVK.I	KEPFFYGHDNQDQLVK	N (in CKA1 and CKA2)			RB11	R.VYTDVNVIRPK.D	VYTDVNVIRPK	Y
		R.AMSKARVYTEVNVIRPK.D	AMSKARVYTEVNVIRPK	Y				K.EAMAHPYFAQVR.A	EAMAHPYFAQVR	Y
								K.ILQNLCGGPNIVK.L	ILQNLCGGPNIVK	N (in all 4 CKA)
								K.VLGTDELNAYLNK.Y	VLGTDELNAYLNK	N (in CKA1, CKA2 and CKAcp)
								R.HLVSPEAIDYLDK.L	HLVSPEAIDYLDK	Y
								K.ALDFCHSQGIMHR.D	ALDFCHSQGIMHR	N (in CKA1, CKA2 and CKA3)
								R.DVKPHNVMIDHELR.K	DVKPHNVMIDHELR	N (in CKA1 and CKA2)
								K.YSEVFEGINMNNNEK.C	YSEVFEGINMNNNEK	Y
								R.DVKPHNVMIDHELRK.L	DVKPHNVMIDHELRK	N (in CKA1 and CKA2)
								K.EPFFYGHDNQDQLVK.I	EPFFYGHDNQDQLVK	N (in CKA1 and CKA2)
								R.KEPFFYGHDNQDQLVK.I	KEPFFYGHDNQDQLVK	N (in CKA1 and CKA2)

## Sheet: other kinase peptides
CRK9 (AT4G23170)
date	sample	peptides	peptides	proteotypic?
2008-07-28	5	R.MPLSRIGAR.Q	MPLSRIGAR	Y
? (AT1G09600)
date	sample	peptides	peptides	proteotypic?
2008-08-27	9	K.AQEEEAKR.K	AQEEEAKR	Y? (second protein fits, AGI could not be determined, could be the same protein)
(AT3G13670)
date	sample	peptides	peptides	proteotypic?
2008-10-21	10	R.SAGASILEVALK.F	SAGASILEVALK	Y
		R.LSIGEEEEDAPR.K	LSIGEEEEDAPR	Y
	7C	R.SAGASILEVALK.F	SAGASILEVALK	Y
CDKC2 (AT5G64960) / CDKC1 (AT5G10270)
date	sample	peptides	peptides	proteotypic?
2008-10-21	6C	K.TGEIVALKKIR.M	TGEIVALKKIR	N (splicing form 1 of CDKC1 and CDKC2)
CKL2 (AT1G72710)
date	sample	peptides	peptides	proteotypic?
2008-10-21	A	R.IEFVHQK.S	IEFVHQK	Y
		K.APVSSDPAISK.D	APVSSDPAISK	Y
		K.HPQLLYESK.L	HPQLLYESK	N (CKL2, CKL1 and CKL12)
		K.VSTSIEALCR.G	VSTSIEALCR	N (CKL2 and CKL1)
		K.VLQGGTGVPNVK.W	VLQGGTGVPNVK	Y
		R.NSPIVSSEINK.L	NSPIVSSEINK	Y
		K.DVVLSSSSFLR.A	DVVLSSSSFLR	Y
		R.NSGQIFNSGSLAK.Q	NSGQIFNSGSLAK	Y
		K.QKAPVSSDPAISK.D	QKAPVSSDPAISK	Y
		K.TKHPQLLYESK.L	TKHPQLLYESK	N (CKL2, CKL1 and CKL12)
		R.FDDKPDYAYLK.R	FDDKPDYAYLK	N (CKL2, CKL1, CKL5, and AT4G08800.1)
		K.YQQSQISTPPPR.H	YQQSQISTPPPR	Y
		K.TVLMLADQMINR.I	TVLMLADQMINR	N (CKL2, CKL13, CKL5, CKL8 and AT4G08800.1)
		R.ANQVYVIDFGLAK.K	ANQVYVIDFGLAK	Y
		R.DIKPDNFLMGLGR.R	DIKPDNFLMGLGR	N (CKL2, CKL4, CKL5, CKL6, CKL7, CKL8, CKL10, CKL11, CKL13...)
		R.RANQVYVIDFGLAK.K	RANQVYVIDFGLAK	Y
		R.YASMNTHLGIEQSR.R	YASMNTHLGIEQSR	N (CKL2, CKL1 and CKL12)
		R.EAAVLGTDSEPSNPQIVEAGSGSNSK.I	EAAVLGTDSEPSNPQIVEAGSGSNSK	Y
	B	R.IEFVHQK.S	IEFVHQK	Y
		K.APVSSDPAISK.D	APVSSDPAISK	Y
		K.VSTSIEALCR.G	VSTSIEALCR	N (CKL2 and CKL1)
		K.VLQGGTGVPNVK.W	VLQGGTGVPNVK	Y
		R.NSPIVSSEINK.L	NSPIVSSEINK	Y
		K.DVVLSSSSFLR.A	DVVLSSSSFLR	Y
		R.NSGQIFNSGSLAK.Q	NSGQIFNSGSLAK	Y
		K.TKHPQLLYESK.L	TKHPQLLYESK	N (CKL2, CKL1 and CKL12)
		R.FDDKPDYAYLK.R	FDDKPDYAYLK	N (CKL2, CKL1, CKL5, and AT4G08800.1)
		K.YQQSQISTPPPR.H	YQQSQISTPPPR	Y
		K.TVLMLADQMINR.I	TVLMLADQMINR	N (CKL2, CKL13, CKL5, CKL8 and AT4G08800.1)
		R.YASMNTHLGIEQSR.R	YASMNTHLGIEQSR	N (CKL2, CKL1 and CKL12)
		R.EAAVLGTDSEPSNPQIVEAGSGSNSK.I	EAAVLGTDSEPSNPQIVEAGSGSNSK	Y
MPK16 (AT5G19010)
date	sample	peptides	peptides	proteotypic?
2008-10-21	B	K.ICDFGLAR.V	ICDFGLAR	N (MPK1, 2, 3, 6, 7, 8, 9, 10, 13, 14, 15, 16, 20 and At1G67580)
		R.APELCGSFFSK.Y	APELCGSFFSK	N (MPK8, 9, 15, 16, 18)
		K.INDIFEHVSDATR.I	INDIFEHVSDATR	Y
(AT1G51850)
date	sample	peptides	peptides	proteotypic?
2008-12-17	RC2	K.TNSLQVCLIK.T	TNSLQVCLIK	? (fits to sequence in UniProt, but not to sequence on TAIR)
CSK (AT1G67840)
date	sample	peptides	peptides	proteotypic?
2008-12-17	RC2	R.MSKLVEQIR.G	MSKLVEQIR	Y
(AT2G28990)
date	sample	peptides	peptides	proteotypic?
2008-12-17	RB1	R.YADDVHDR.I	YADDVHDR	Y
MPK
date	sample	peptides	peptides	proteotypic?
2008-12-17	RB7	K.ICDFGLAR.T	ICDFGLAR	N (MPK1, 2, 3, 6, 7, 8, 9, 10, 13, 14, 15, 16, 20 and At1G67580)
CRCK3 (AT2G11520)
date	sample	peptides	peptides	proteotypic?
2008-12-17	RB9	K.ERKANSHEVLPK.E	ERKANSHEVLPK	Y
CERK1 (AT3G21630)
date	sample	peptides	peptides	proteotypic?
2008-12-17	RB10	K.QFLAELKVLTR.V	QFLAELKVLTR	Y
