# Supplementary material for: SnRK1-triggered switch of bZIP63 dimerization mediates the low-energy response in plants
Source: eLife. 2015 Aug 11;4:e05828. doi: 10.7554/eLife.05828 (PMC4558565; doi:10.7554/eLife.05828)
Supplement: Figure 7—source data 1. — The tab ‘metabolites normalized to wt’ contains the relative metabolite levels, which were used to calculate the fold changes shown in Figure 7E, as well as p-values from statistical tests. Values are the mean ± SD of five biological replicates given as fold change to the corresponding wt. The tab ‘PCA—variance and loadings’ contains the SD, proportion of variance, and loadings of all principal components from the PCA analysis shown in Figure 7F. DOI: http://dx.doi.org/10.7554/eLife.05828.034 [file elife05828s006.xlsx]

## Sheet: metabolites normalized to wt
Means (n=5) and standard deviations of metabolites measured in wild-type and bZIP63 mutant lines normalized to the corresponding wild-type.																		Statistical tests (ANOVA)
	Ws-2		bzip63		GY9		GY11		GAY4		GAY14		Col-0		ox#3			Levene's variance test	ANOVA or Welch ANOVA	p values of post-hoc test: TukeyHSD (equal variance) or Games Howell (unequal variance)
	mean	SD	mean	SD	mean	SD	mean	SD	mean	SD	mean	SD	mean	SD	mean	SD		equal/unequal (>0,05/<0,05)	p-value (<0,05 → differences)	bzip63 ko - WS-2	GY9 - WS-2	GY11 - WS-2	GAY4 - WS-2	GAY14 - WS-2	Col-0 - WS-2	OE3 - WS-2	GY9 - bzip63 ko	GY11 - bzip63 ko	GAY4 - bzip63 ko	GAY14 - bzip63 ko	Col-0 - bzip63 ko	OE3 - bzip63 ko	GY11 - GY9	GAY4 - GY9	GAY14 - GY9	Col-0 - GY9	OE3 - GY9	GAY4 - GY11	GAY14 - GY11	Col-0 - GY11	OE3 - GY11	GAY14 - GAY4	Col-0 - GAY4	OE3 - GAY4	Col-0 - GAY14	OE3 - GAY14	OE3 - Col-0
Serine	1	0.0392575	1.36882	0.253894	1.08703	0.264438	0.944109	0.172039	1.32079	0.120169	1.26351	0.144641	1	0.100357	0.712867	0.0742714		0.1247	9.47e-08	0.0218687	0.988808	0.999284	0.0663162	0.208027	0.795134	0.0105799	0.148192	0.0053525	0.999735	0.967357	0.0003637	5e-07	0.855902	0.339848	0.67843	0.295487	0.0010685	0.0180567	0.068354	0.975569	0.0409578	0.999161	0.0013508	1.7e-06	0.0061674	8.2e-06	0.297124
O-Acetyl Serine	1	0.11139	1.44551	0.315545	0.678281	0.117535	0.737475	0.398735	1.17102	0.346841	0.945139	0.292539	1	0.267721	0.548521	0.157705		0.4191	3.88e-05	0.164746	0.537072	0.757871	0.966123	0.999974	0.914321	0.034383	0.001382	0.0036844	0.715615	0.0832803	0.0092097	2.19e-05	0.999956	0.0920105	0.74268	0.996406	0.8219	0.189205	0.909898	0.999966	0.613761	0.86813	0.341591	0.0023549	0.983179	0.0738697	0.400809
Cysteine	1	0.59673	1.62726	0.371182	0.774979	0.378146	0.99117	0.538277	1.46925	0.389732	1.40412	0.307267	1	0.453493	0.623882	0.372163		0.7711	5.83e-05	0.23632	0.984477	1	0.586634	0.744738	0.566086	0.168041	0.0355891	0.221911	0.998154	0.985387	0.00268	0.0003011	0.987683	0.143251	0.232414	0.971548	0.638333	0.564137	0.72413	0.588584	0.179777	0.999996	0.0142728	0.0017639	0.0271203	0.0035592	0.992986
Glycine	1	0.122433	1.60193	0.254678	1.26874	0.239284	1.1079	0.0388995	1.71295	0.10854	1.83363	0.440433	1	0.172701	0.706535	0.199698		0.5772	2e-11	0.0033245	0.547727	0.908885	0.0003814	3.11e-05	0.180401	0.0083124	0.284401	0.0771466	0.993218	0.714036	1.9e-06	1e-07	0.997338	0.0603083	0.0067753	0.0016509	3.88e-05	0.0118125	0.0010952	0.0099878	0.0002602	0.985962	2e-07	0	0	0	0.883043
Shikimic acid	1	0.269164	1.16953	0.095045	1.23313	0.224749	1.05316	0.163323	1.2232	0.252681	1.33554	0.167205	1	0.254632	1.05564	0.309859		0.5154	0.348
Tryptophane	1	0.0768552	1.08329	0.206146	0.992972	0.210654	0.944134	0.290994	1.23373	0.436815	1.1934	0.399695	1	0.307051	0.784991	0.252247		0.7108	0.394
Tyrosine	1	0.309645	1.28932	0.222737	0.719116	0.21775	0.727426	0.388575	1.36665	0.42739	1.08535	0.354796	1	0.249593	0.617209	0.154122		0.5623	0.000175	0.774316	0.798654	0.821407	0.518971	0.999767	0.771121	0.0832445	0.0755942	0.083375	0.999879	0.953558	0.0674664	0.0016135	1	0.0287265	0.520408	1	0.797919	0.0320136	0.548674	1	0.773921	0.797459	0.0253456	0.0005049	0.488418	0.0287878	0.823913
Phenylalanine	1	0.336651	1.59064	0.174788	1.03168	0.138037	1.07028	0.299241	1.81092	0.384608	1.41642	0.376984	1	0.320987	0.569145	0.20421		0.6234	8.94e-06	0.0623804	1	0.99994	0.0032038	0.369424	0.999969	0.436707	0.090598	0.139041	0.934059	0.980994	0.12978	0.0002394	0.999999	0.005055	0.468194	1	0.341286	0.0087219	0.597882	1	0.242885	0.43672	0.0079739	8.5e-06	0.576109	0.0032036	0.257723
Alanine	1	0.243341	1.33335	0.324196	1.20442	0.373379	1.06206	0.246059	1.25887	0.222041	1.1479	0.138435	1	0.0544505	0.943557	0.0502511		0.3957	0.246
Valine	1	0.188323	1.12155	0.29668	1.09444	0.0956189	0.969447	0.364027	1.25565	0.0870537	1.0871	0.418616	1	0.203295	0.769571	0.162522		0.382	0.299
Leucine	1	0.401299	1.06854	0.166145	1.00604	0.195256	0.988786	0.225912	1.19859	0.305474	1.04357	0.552218	1	0.227469	0.587852	0.126046		0.3655	0.288
Glutamic acid	1	0.910728	1.92214	1.30362	1.17104	0.637214	0.676587	0.664547	1.91386	0.879834	1.98521	1.04284	1	0.72614	0.362213	0.220676		0.6482	0.0435	0.698381	0.999982	0.998778	0.70753	0.626669	0.999989	0.961093	0.863965	0.339351	1	1	0.855482	0.147666	0.983752	0.87039	0.809632	1	0.864259	0.34738	0.281816	0.985648	0.999732	1	0.862125	0.152146	0.799616	0.116919	0.872452
Glutamine	1	0.557624	2.15104	0.703386	0.63325	0.247272	0.737423	0.494925	1.99213	0.476651	1.82128	0.746382	1	0.631556	0.226961	0.0904248		0.3958	7.2e-06	0.0359992	0.957214	0.99353	0.103496	0.2706	1	0.348586	0.0021838	0.0050183	0.999736	0.975829	0.0420791	7.86e-05	0.999985	0.0076983	0.0276709	0.942079	0.932525	0.0169901	0.0571564	0.989489	0.810326	0.999574	0.118711	0.0002972	0.301798	0.001221	0.314437
Proline	1	0.506725	5.79858	1.65674	2.65075	1.2523	2.25913	1.44528	5.82547	3.35322	5.6471	3.38473	1	0.652219	0.513956	0.251747		0.1309	0.000128	0.010571	0.880318	0.968706	0.0099908	0.0144844	0.998991	1	0.216713	0.117192	1	1	0.0438918	0.0081901	0.999981	0.208313	0.268597	0.994149	0.837617	0.112026	0.150084	0.999814	0.949323	1	0.0417042	0.0077353	0.0582586	0.0112678	0.997261
Ornithine	1	0.36894	1.33313	0.301925	0.72228	0.0324913	0.520324	0.22428	1.35559	0.529026	1.14487	0.18162	1	0.299731	0.800175	0.362872		0.3407	0.000326	0.665678	0.936691	0.232541	0.591657	0.994316	0.927555	0.499587	0.10677	0.0040085	1	0.974065	0.0997143	0.0150139	0.878382	0.0830808	0.549985	1	0.989649	0.0029167	0.0485249	0.891062	0.999575	0.952746	0.0773916	0.0111123	0.529459	0.144121	0.991803
Arginine	1	0.682578	2.54069	1.19557	0.537806	0.160998	0.553815	0.570226	1.99696	0.713137	1.25101	0.33667	1	0.502305	0.467485	0.26588		0.1429	6.38e-06	0.0075723	0.926724	0.93818	0.198446	0.997712	0.951966	0.563731	0.0002758	0.0003096	0.846129	0.0391158	0.0003631	3.77e-05	1	0.0131645	0.593534	1	0.996476	0.0146109	0.619454	1	0.99501	0.539128	0.016859	0.002036	0.654987	0.213061	0.992232
Aspartic acid	1	0.219174	1.2201	0.168282	0.846561	0.0273291	0.833771	0.34044	1.24912	0.106209	0.999788	0.0998425	1	0.239582	0.805572	0.181225		0.2903	0.00399	0.631333	0.910969	0.871764	0.481785	1	1	0.718213	0.0790789	0.0626943	0.999997	0.630239	0.577411	0.0311797	1	0.0462623	0.911549	0.936632	0.999903	0.0361628	0.872483	0.904308	0.999987	0.480716	0.430365	0.0173706	1	0.719243	0.767133
Asparagine	1	0.370733	1.66394	0.309202	0.876813	0.185252	0.903964	0.444108	1.75552	0.522039	1.21436	0.398883	1	0.282762	0.535287	0.222898		0.7406	8.64e-05	0.100905	0.999287	0.999862	0.0406715	0.978958	1	0.498271	0.0290962	0.0388171	0.9999	0.510043	0.121651	0.000592	1	0.010508	0.808723	0.998104	0.823957	0.0143072	0.865159	0.99951	0.760591	0.283331	0.0501622	0.0001885	0.988068	0.0969493	0.443356
Lysine	1	0.424138	1.44659	0.141651	0.807347	0.177272	0.832696	0.421821	1.49929	0.507641	1.22429	0.293097	1	0.358597	0.605629	0.192978		0.5131	0.00152	0.442137	0.983758	0.992883	0.305857	0.962507	1	0.563984	0.0872288	0.112301	0.999996	0.964242	0.394437	0.0077673	1	0.050096	0.528071	0.990608	0.972139	0.0657177	0.603704	0.996347	0.949415	0.897002	0.267184	0.0040168	0.944847	0.0965485	0.615849
Beta-Alanine	1	0.34494	1.45648	0.121684	1.19368	0.173172	1.1109	0.327992	1.47596	0.368421	1.37672	0.378274	1	0.21348	0.777768	0.151911		0.6991	0.0139	0.321095	0.974309	0.999121	0.273157	0.558497	0.0084739	0.781655	0.881344	0.658511	1	0.9999	0.720157	0.993626	0.999872	0.838378	0.981242	0.0907798	0.999134	0.596118	0.875149	0.0348763	0.974494	0.999574	0.776599	0.987008	0.46744	0.999948	0.268902
Homoserine	1	0.291375	1.50658	0.108514	1.22888	0.331407	0.904706	0.360874	1.95351	0.373631	1.84053	0.60615	1	0.226285	0.730007	0.296284		0.7477	4e-05	0.355502	0.968978	0.999866	0.0041607	0.0155005	0.998831	0.993729	0.917308	0.171453	0.511617	0.813286	0.714149	0.0842128	0.834617	0.0540566	0.157629	0.999852	0.637304	0.0013086	0.0051442	0.970016	0.999965	0.999583	0.0192611	0.0004959	0.0637744	0.002007	0.871309
Methionine	1	0.370752	1.15049	0.133449	0.507054	0.376477	0.374294	0.245314	0.600206	0.378698	0.274349	0.125988	1	0.773536	0.947645	0.407946		0.3844	0.000282	0.990606	0.163313	0.0332648	0.389732	0.015002	0.0816065	0.061442	0.0262863	0.0040167	0.0856724	0.0016697	0.0112709	0.0080828	0.995582	0.999537	0.963554	0.999972	0.999752	0.916158	0.999979	0.999922	0.999995	0.773859	0.989006	0.975549	0.996099	0.998877	1
Threonine	1	0.146877	1.40473	0.436841	1.05486	0.330127	0.847324	0.0929043	1.31295	0.35701	1.2222	0.424812	1	0.135094	0.82241	0.196545		0.4799	0.08
Isoleucine	1	0.354899	1.33009	0.16259	1.29351	0.188708	1.13953	0.299736	1.48259	0.334206	1.43134	0.52736	1	0.202752	0.866158	0.0449697		0.2652	0.227
Pyruvic acid	1	0.327787	1.55907	0.100793	0.88817	0.335235	0.806287	0.338793	1.3138	0.519943	0.86454	0.175556	1	0.36427	1.14939	0.274642		0.5613	0.0028	0.116147	0.999002	0.972649	0.744709	0.999595	0.91861	0.997874	0.0319129	0.0111511	0.908941	0.0381083	0.0060223	0.0267749	0.999872	0.392315	1	0.997678	1	0.195313	0.999623	0.999998	0.999964	0.435459	0.123401	0.352348	0.995485	1	0.998896
Citric acid	1	0.233383	1.5558	0.299741	1.69675	0.21673	2.08219	0.531082	2.53018	0.774218	1.98718	0.471123	1	0.415211	0.902926	0.319297		0.6914	0.000632	0.613355	0.335605	0.0243446	0.0004704	0.0512846	0.819312	0.970169	0.999756	0.673924	0.0564758	0.845668	0.99996	0.991179	0.906482	0.151581	0.978231	0.991101	0.902199	0.819582	0.999983	0.452203	0.218222	0.639901	0.0243772	0.007502	0.648112	0.365762	0.99976
2-Oxoglutarate	1	0.36196	1.40558	0.102612	0.609565	0.20021	0.649069	0.217842	1.46954	0.14145	1.07349	0.330418	1	0.388651	1.07903	0.497128		0.3221	0.000215	0.370528	0.417403	0.550929	0.206671	0.999904	0.998343	0.999997	0.0029472	0.0052933	0.999962	0.616403	0.122186	0.253115	0.999999	0.0011226	0.218384	0.794847	0.563248	0.0020468	0.316063	0.893378	0.699538	0.399832	0.0571099	0.130921	0.967898	0.998011	0.999929
Succinic acid	1	0.243042	0.896101	0.0421381	0.862029	0.0899927	1.02237	0.185584	1.26963	0.159042	1.11754	0.293662	1	0.389451	0.799322	0.224642		0.1356	0.112
Fumaric acid	1	0.305834	1.47919	0.236135	1.1767	0.394091	1.37229	0.403659	1.72479	0.247702	1.61139	0.56735	1	0.119775	1.06393	0.22675		0.4302	0.0631
Malic acid	1	0.0906835	1.45077	0.236078	1.05361	0.0400506	1.16418	0.207453	1.59915	0.292572	1.37862	0.26971	1	0.161942	0.89637	0.130243		0.6101	7.54e-05	0.0226671	0.99958	0.892364	0.000983	0.0862843	0.992483	1	0.0738676	0.340985	0.933427	0.999007	0.13662	0.0171177	0.99196	0.0039073	0.233081	0.999989	0.998449	0.0308255	0.688816	0.999528	0.845352	0.658965	0.0084736	0.000718	0.374562	0.0673779	0.98371
Oxaloacetate	1	0.353659	0.631153	0.14045	1.10138	0.486698	0.784695	0.43113	0.702975	0.405128	0.693496	0.318301	1	0.462308	1.38964	0.680135		0.5055	0.119
Sucrose	1	0.315968	1.21024	0.321982	1.16227	0.469157	1.07773	0.281715	1.34162	0.385428	1.36215	0.454573	1	0.238295	1.47118	0.429783		0.9718	0.394
Glucose	1	0.228717	0.719046	0.119133	0.439466	0.113965	0.483342	0.0993963	0.896751	0.231536	0.690631	0.204044	1	0.207457	0.847435	0.0606263		0.4806	6e-05	0.152747	0.0001401	0.0004692	0.971069	0.086261	0.469874	0.0531862	0.156799	0.333109	0.673906	0.999992	0.997073	0.999629	0.999858	0.0023398	0.260394	0.0353962	0.368542	0.0073733	0.492452	0.093337	0.629376	0.499515	0.963519	0.371335	0.977894	0.999999	0.935187
Fructose	1	0.282678	0.518154	0.0627892	0.307636	0.0770772	0.415718	0.181468	0.537385	0.0500335	0.337458	0.0514215	1	0.242258	0.613471	0.0700201		0.04701	0.0001396	0.129675	0.035959	0.066775	0.142227	0.0520624	0.0491212	0.0277532	0.0207086	0.90439	0.999877	0.461801	0.164423	0.00505142	0.895411	0.012575	0.892219	0.927145	0.952709	0.833917	0.999975	0.99879	0.642685	0.343223	0.101654	0.0033857	0.999983	0.511487	0.471638
Galactose	1	0.187578	1.14647	0.0625985	1.13278	0.036945	1.0111	0.15102	1.13503	0.193611	1.11481	0.184815	1	0.209688	0.926844	0.181605		0.4326	0.231
Maltose	1	0.336878	0.475396	0.154002	1.21856	0.379877	1.0412	0.0289952	1.55841	0.0861852	1.34356	0.529871	1	0.275703	1.11875	0.463134		0.1238	1.56e-09	0.0847528	0.909425	1	0.141296	0.517582	0.0005886	0.0007698	0.0037513	0.0783842	5.37e-05	0.0005136	0.548189	0.60903	0.921046	0.797071	0.995864	1.66e-05	2.18e-05	0.151677	0.540162	0.0005322	0.0006963	0.992329	2e-07	3e-07	2.2e-06	2.9e-06	1
Myo-Inositol	1	0.0881059	1.55266	0.224257	0.865496	0.182989	0.813125	0.0229202	1.53182	0.341922	1.21926	0.304616	1	0.0873707	0.771512	0.0797027		0.1817	7.07e-07	0.0027506	0.959791	0.813097	0.0043055	0.666054	0.960754	0.972619	0.0001383	4.24e-05	1	0.180052	0.0421673	0.0001706	0.99988	0.0002213	0.131141	0.422787	1	6.78e-05	0.0532524	0.216801	0.999645	0.243407	0.0617733	0.0002728	0.997124	0.151978	0.467135
Trehalose	1	0.224245	1.23543	0.0534658	1.40606	0.170361	1.16915	0.240046	1.74642	0.303968	1.81605	0.414239	1	0.077267	2.11413	0.271696		0.5556	1.66e-06	0.825558	0.229178	0.963594	0.0014358	0.0004295	1	0.0002344	0.961887	0.99989	0.0608926	0.021814	0.781153	0.0127	0.82108	0.435923	0.219384	0.195995	0.146254	0.0229681	0.0076208	0.945178	0.0043103	0.999847	0.0011307	0.997882	0.0003369	0.999999	0.0001836
Raffinose	1	0.455767	1.06432	0.305363	0.135851	0.0581486	0.212418	0.106122	1.26316	0.964325	0.38394	0.270931	1	0.430894	0.492674	0.364025		0.005963	0.0001749	0.998996	0.0865202	0.115445	0.994181	0.315341	0.308384	0.999991	0.0172256	0.0195209	0.999554	0.0681221	0.37849	1	0.826814	0.348155	0.559368	0.0621304	0.343512	0.403829	0.861078	0.0697317	0.414341	0.573289	0.820644	0.999823	0.089488	0.644577	0.527771
Threitol	1	0.277144	1.19232	0.122107	1.37066	0.236351	1.16788	0.344214	1.18749	0.230671	1.22813	0.285826	1	0.259619	1.10302	0.344247		0.9649	0.05999
Galactinol	1	0.286062	0.77304	0.147256	0.718745	0.165308	0.761512	0.0103131	0.943039	0.266464	0.745192	0.274047	1	0.058146	0.935003	0.247586		0.2118	0.255
Threonic acid	1	0.32532	0.795867	0.0319398	1.12484	0.324154	0.958179	0.283358	1.19173	0.397624	1.18223	0.394187	1	0.379914	0.750716	0.242336		0.431	0.346
Gluconic acid	1	0.376439	1.06729	0.409042	1.12655	0.437168	0.720156	0.150157	0.704382	0.252257	0.543654	0.139332	1	0.419463	0.965654	0.234912		0.7319	0.174
Putrescine	1	0.256403	1.10341	0.160621	0.877993	0.161486	0.664752	0.126998	1.07553	0.354078	1.02995	0.213863	1	0.17565	0.874524	0.316989		0.4728	0.0632
Spermidine	1	0.362432	0.964201	0.107603	0.861688	0.125892	0.662703	0.220571	1.00449	0.240628	0.981052	0.219488	1	0.232218	0.753296	0.326617		0.6899	0.00649	0.999996	0.972776	0.269917	1	1	0.388869	0.0335895	0.995223	0.403255	0.99999	1	0.544722	0.0612021	0.839967	0.967637	0.988151	0.92837	0.267117	0.255483	0.336651	0.999998	0.971842	1	0.370863	0.0310813	0.469173	0.0463501	0.917942
Ascorbic acid	1	0.414536	1.28234	0.185527	0.863526	0.21466	1.04626	0.463801	1.06909	0.179896	1.24573	0.114776	1	0.336993	1.99646	0.758078		0.2937	0.0728
																		red = unequal variance	green = statistically different	green = statistically different
																			red = not statistically different	black = not statistically different

## Sheet: PCA - variance and loadings
Importance of components
	PC1	PC2	PC3	PC4	PC5	PC6	PC7	PC8	PC9	PC10	PC11	PC12	PC13	PC14	PC15	PC16	PC17	PC18	PC19	PC20	PC21	PC22	PC23	PC24	PC25	PC26	PC27	PC28	PC29	PC30	PC31	PC32	PC33	PC34	PC35	PC36	PC37	PC38	PC39	PC40
Standard deviation	4.0374	2.8075	1.99863	1.81923	1.6494	1.52618	1.33578	1.1896	1.03355	0.97037	0.81146	0.74509	0.6716	0.63747	0.54206	0.51471	0.4935	0.45025	0.40313	0.36714	0.36343	0.32677	0.3099	0.3001	0.2799	0.2711	0.24263	0.22411	0.20114	0.18395	0.17642	0.15473	0.14034	0.1174	0.10648	0.09852	0.08201	0.05889	0.03246	3.195e-16
Proportion of Variance	0.3543	0.1714	0.08684	0.07195	0.05914	0.05064	0.03879	0.03076	0.02322	0.02047	0.01431	0.01207	0.0098	0.00883	0.00639	0.00576	0.0053	0.00441	0.00353	0.00293	0.00287	0.00232	0.00209	0.00196	0.0017	0.0016	0.00128	0.00109	0.00088	0.00074	0.00068	0.00052	0.00043	0.0003	0.00025	0.00021	0.00015	8e-05	2e-05	0
Cumulative Proportion	0.3543	0.5257	0.61254	0.68449	0.74363	0.79427	0.83306	0.86382	0.88704	0.90751	0.92183	0.9339	0.9437	0.95254	0.95892	0.96468	0.97	0.97438	0.97792	0.98085	0.98372	0.98604	0.98813	0.99009	0.9918	0.9934	0.99467	0.99576	0.99664	0.99737	0.99805	0.99857	0.999	0.9993	0.99954	0.99976	0.9999	0.99998	1	1
Loadings
	PC1	PC2	PC3	PC4	PC5	PC6	PC7	PC8	PC9	PC10	PC11	PC12	PC13	PC14	PC15	PC16	PC17	PC18	PC19	PC20	PC21	PC22	PC23	PC24	PC25	PC26	PC27	PC28	PC29	PC30	PC31	PC32	PC33	PC34	PC35	PC36	PC37	PC38	PC39	PC40
Oxoglutaricacid	-0.188997	-0.0577041	0.144816	-0.0564133	0.0587107	-0.199647	0.0456652	0.227575	-0.000775444	-0.0622045	-0.164658	0.257483	-0.0709148	0.117811	-0.182912	0.0293947	0.046105	-0.0174438	0.201798	-0.129518	0.234409	-0.197336	0.235128	0.0418998	0.144647	0.121912	0.369437	-0.112162	-0.0956071	-0.250591	-0.0784771	0.119311	0.0173315	-0.0279082	-0.20281	-0.181685	-0.104	0.126751	-0.0768399	0.171746
Alanine	-0.106578	0.214316	0.00917113	-0.149043	0.210324	0.0438233	-0.0139736	-0.0566291	0.0885222	-0.286117	0.25372	-0.281199	-0.0330269	-0.154063	0.210343	0.168542	-0.11744	0.108173	0.0871361	-0.392165	0.0704021	0.0673831	0.138468	0.30776	0.238884	-0.088866	0.0269594	-0.0369208	0.114681	0.0347316	0.177533	-0.127721	0.0816574	-0.136207	0.0817211	-0.0389664	0.0712775	-0.00138969	-0.136382	0.126667
Arginine	-0.210967	0.099911	0.0805619	-0.0150916	-0.046845	-0.0210038	0.125561	-0.0590581	-0.0444343	0.0114694	-0.0108224	-0.273185	-0.12566	7.50854e-05	-0.288645	-0.229604	0.213832	-0.0279031	-0.205229	-0.00361457	0.17029	-0.0499014	-0.137275	-0.179102	0.227976	-0.205992	0.0196745	-0.104628	-0.0553622	0.247379	0.0182435	0.0167238	-0.325414	-0.164487	-0.0133104	-0.177799	-0.00551112	0.168386	-0.0787372	0.0398406
Ascorbicacid	-0.00431045	-0.0387512	0.0780531	-0.166121	0.248447	-0.37272	0.13632	-0.0318455	-0.440217	-0.00947762	0.0950417	-0.0952384	0.408938	0.211518	-0.0373351	-0.0528059	-0.240309	-0.0144841	0.137886	0.213337	-0.111441	0.0545396	0.0653552	-0.215089	0.0096984	-0.0683023	0.0218731	-0.0837737	0.0743881	0.0248478	0.210661	-0.192706	-0.0419453	-0.0675287	0.0652855	-0.0229909	0.00467127	-0.00975591	-0.0561036	0.0469211
Asparagine	-0.232685	-0.0206286	0.0436149	0.0166821	-0.0522997	0.0461446	0.032365	-0.0164355	-0.0807502	0.0997422	0.0265122	-0.142805	-0.108857	-0.0413364	-0.0931879	-0.120418	0.22703	0.0517644	-0.037326	-0.0231462	-0.30369	-0.235165	0.215998	-0.156407	0.0122728	0.154224	-0.225531	-0.16219	0.321191	-0.0160688	0.115758	0.0383844	0.254356	0.0507188	0.017741	-0.0464781	0.0880667	-0.0226837	0.339511	0.248961
Asparticacid	-0.212306	0.0133406	0.0677812	-0.0853465	-0.0715828	0.0466317	0.171295	0.237223	0.0167966	-0.0361956	-0.0610747	-0.0777654	0.0714943	-0.209182	0.011834	0.0638516	-0.0590563	-0.0366956	-0.221184	0.0796191	-0.0427136	-0.106909	0.258656	0.168501	-0.339251	-0.219931	-0.0580984	-0.286673	-0.0653434	-0.271547	0.176962	0.0953199	-0.14575	-0.00931293	0.0826712	0.115505	-0.0845952	-0.131717	0.051414	-0.0130219
BetaAlanine	-0.130731	-0.224165	0.1286	-0.0222284	0.228689	0.10975	0.0303461	0.0735746	0.0348243	0.182594	0.0179313	0.0575133	0.0402906	0.0688701	0.10851	0.246314	-0.0413594	-0.0351772	-0.00281977	-0.0735386	0.023527	0.0213615	-0.0729335	-0.10614	-0.0396457	-0.377568	-0.125821	0.0838062	0.191152	0.156684	-0.0731703	0.303654	0.126773	0.0844225	0.106052	-0.0224854	-0.1446	0.470763	-0.0565191	0.075899
Citricacid	-0.121551	-0.0431407	-0.310432	-0.0995167	0.066377	0.0502056	0.0663466	0.391615	0.048244	-0.0476383	0.164617	-0.0411944	-0.179747	0.0205815	-0.197356	0.0072797	-0.165048	0.194833	0.0343715	0.227981	0.147638	-0.0113741	0.00421313	0.130732	-0.210774	0.0275888	-0.0463803	0.178925	0.129348	0.0954452	0.0799343	-0.0927604	0.0475464	0.0432442	-0.122538	-0.395238	0.0788565	-0.0325144	-0.0403744	-0.0581415
Cysteine	-0.171861	0.0885382	-0.114267	-0.00965034	-0.0928661	-0.223064	-0.0454503	0.0937504	-0.0198541	0.204109	0.0268169	-0.074668	0.504821	-0.343467	0.00607365	-0.0808843	0.125431	0.177186	-0.122222	-0.0714601	0.333328	-0.0699247	-0.196454	0.0688322	0.0395874	0.279304	-0.0411409	0.0321139	0.151862	-0.045632	-0.156805	0.0336993	0.0748953	0.0865887	-0.0142258	0.172036	-0.0023054	0.0649697	-0.127921	0.051406
Fructose	0.00440098	0.117935	0.14444	0.200836	-0.395197	-0.0411125	-0.249946	0.13951	-0.00857258	-0.144475	-0.129157	-0.0361389	0.124813	0.335728	-0.0665379	-0.0243324	0.0113315	-0.11478	-0.0540006	-0.18045	0.104428	0.0738457	0.0950336	-0.0573055	-0.034074	-0.051286	-0.0157094	0.195543	0.134415	0.00408426	0.298474	-0.0395227	0.378705	-0.0954856	0.0648311	0.00692863	-0.13653	-0.0314812	-0.112009	0.0475
Fumaricacid	-0.0040509	0.108201	-0.0799616	0.387775	0.29248	-0.143202	-0.0755271	0.130096	0.0793557	0.130893	0.159455	0.0753514	-0.112521	-0.0698079	-0.0352632	-0.0167712	0.0614792	-0.0414247	0.0678989	-0.0626743	-0.132999	-0.0071196	0.0896007	-0.217732	0.0584469	0.225356	0.0727961	-0.0661055	0.194081	0.0159722	0.0531491	0.221011	-0.000138946	-0.185038	0.22958	-0.134432	0.157777	-0.106856	-0.198064	-0.324208
Galactinol	-0.0628515	-0.241306	0.176081	0.0944502	-0.128101	-0.0832422	-0.0561729	0.120638	-0.199105	-0.231519	0.202162	-0.0563964	-0.0989672	-0.421704	-0.0717651	0.0890174	0.119946	0.0814965	0.322648	0.0247042	0.0443491	0.0334838	0.0767803	-0.150127	0.168997	-0.0486829	-0.0627275	0.291048	-0.0946091	0.175458	0.0978935	0.0670747	-0.0669747	0.148682	-0.0970613	0.150574	-0.139579	-0.119962	0.183685	-0.0717899
Galactose	-0.0598705	-0.268305	0.106319	0.0504247	0.193048	-0.000825631	0.0160414	-0.0537661	0.319217	-0.0398618	0.112288	-0.219867	0.0420474	0.205001	-0.0801432	0.266745	0.026357	-0.153265	0.055122	0.00149288	0.16823	-0.228852	-0.0108469	-0.162098	-0.017333	0.239998	-0.279716	0.0715368	-0.05432	-0.247928	-0.0171513	-0.19308	-0.162707	-0.0446876	0.0587354	0.0853728	-0.2611	-0.148924	-0.0158477	-0.0515611
Gluconicacid	0.0433016	-0.135539	0.197749	-0.253453	0.0990207	-0.204535	-0.315308	0.0758954	0.164276	0.177616	0.0559224	0.197734	-0.0745338	-0.102053	0.0642603	0.0101711	-0.0194349	-0.235264	-0.327731	0.18215	0.0885826	0.130441	0.147416	0.106371	0.398437	0.0252773	-0.141182	-0.163121	-0.0398253	0.0824834	0.142466	-0.0434741	0.100853	0.173159	-0.00390592	-0.0957584	0.0410568	-0.0471221	0.0456267	-0.0560117
Glucose	-0.0369603	0.0697652	0.244937	0.385008	-0.118421	-0.0462319	-0.0888547	0.129647	-0.0329181	-0.252354	-0.000984562	0.157403	0.181753	0.0992189	0.0597783	0.0626368	0.0878252	0.138146	-0.0445318	0.20868	-0.0361042	0.00503427	0.0602901	0.281496	0.0469194	-0.106158	-0.268486	-0.183579	0.121872	0.167839	-0.264182	-0.117178	-0.244411	-0.00417567	0.0857247	-0.200304	-0.0254097	-0.0704528	-0.0457104	-0.0426511
Glutamicacid	-0.132005	0.19508	0.0260934	-0.0335058	0.0309874	0.00224085	0.164034	-0.17357	0.298146	-0.105222	0.437722	0.196703	0.0710049	0.199157	-0.125061	0.0966986	0.253494	0.0814504	-0.0962771	0.213054	0.0467554	0.28395	-0.00166722	-0.0204364	-0.100347	0.140332	0.0643978	-0.0462009	-0.0729071	0.0766377	0.12269	0.110514	0.0212339	-0.0797876	-0.0413256	0.192598	-0.000819235	0.0372655	0.0722161	0.198755
Glutamine	-0.193119	0.181202	0.0455075	0.0151841	-0.0185571	0.037212	0.148466	-0.081449	0.0710338	0.10683	0.0480674	0.167761	0.115357	0.0488569	-0.134907	0.0111014	0.0624345	0.188579	0.129538	0.0127422	-0.0334426	0.0562488	-0.127205	-0.0352075	0.123798	-0.240192	0.132251	0.0132285	-0.232134	-0.0291091	0.156243	0.069482	0.171541	0.322249	0.180409	-0.139407	-0.190325	-0.290322	0.0186715	-0.16389
Glycine	-0.168353	0.166158	-0.200909	0.0575929	-0.00651391	-0.06495	-0.106956	-0.080411	0.168425	0.030905	-0.0462088	0.0977835	0.193503	0.0202805	0.0917111	-0.149237	-0.171052	-0.20904	0.240057	-0.196027	-0.0983252	0.0300653	0.267519	-0.0741399	0.0454182	-0.0841935	-0.118435	-0.00191791	-0.124525	0.0473346	-0.00203609	0.223212	-0.306065	0.129681	-0.16394	0.0250599	0.184218	-0.087031	0.118212	0.0980075
Homoserine	-0.213863	-0.0257361	-0.108432	0.00872228	0.0306919	-0.00289594	0.0774116	-0.0658957	-0.0960414	-0.0517608	-0.0786772	0.371024	-0.01335	0.0912	0.363958	0.073029	0.0751211	0.237944	-0.174717	-0.123635	0.0843908	-0.389609	-0.0441107	-0.132631	0.0472221	-0.0501075	-0.176472	0.0760665	-0.120134	0.150313	0.241776	-0.0293648	-0.0436481	-0.275263	-0.168142	0.0735796	0.0322516	-0.0431184	-0.0388732	-0.13471
Isoleucine	-0.154381	-0.154208	-0.00107018	-0.0309339	0.258736	0.196492	-0.227873	-0.0880161	-0.108116	-0.0481936	-0.0690362	0.104198	0.0324392	-0.00249926	-0.130191	0.0123346	0.146756	-0.0826666	-0.0916637	0.0276012	-0.0207906	0.0273226	-0.0957105	-0.0174801	-0.0790691	-0.131756	0.104028	0.0677209	0.182209	0.0963527	-0.131259	-0.0580735	0.0724663	-0.0155619	-0.26674	0.0369193	0.123345	-0.472119	-0.192818	0.353169
Leucine	-0.124843	-0.119887	0.121101	-0.0319842	0.129354	0.311625	-0.33966	-0.0393962	-0.120828	0.0693786	0.0429668	0.170674	0.221018	-0.130465	-0.127645	-0.0543351	-0.0179449	0.0826402	0.104402	-0.122026	0.064967	0.20421	-0.0446636	-0.0217979	-0.137002	0.0685451	-0.0569454	-0.0702063	-0.252151	-0.115799	0.0272386	-0.179858	0.0292691	-0.348733	0.0362203	-0.213377	0.0872155	0.123732	0.279746	-0.11636
Lysine	-0.222802	-0.0271706	0.0605466	-0.0156105	-0.0936189	-0.0296059	0.116927	-0.0725523	-0.156952	0.217489	0.102901	0.0809638	-0.101582	-0.0345198	-0.065901	0.135348	-0.15904	-0.0431166	-0.00557269	-0.132026	-0.0854687	0.0706558	-0.131768	0.0452448	-0.0640916	-0.00390989	-0.279568	-0.0427028	-0.0643092	-0.124954	-0.0324398	0.0432039	0.140174	0.150721	-0.0741116	-0.0230942	0.0916321	-0.17865	-0.371499	-0.128357
Malicacid	-0.155632	0.178179	-0.118621	0.00716928	0.0817778	0.0310245	0.141855	0.333592	0.149333	0.0457419	-0.126657	0.0933242	-0.0272938	-0.121078	-0.0686699	-0.204681	-0.105949	-0.161152	-0.0051461	0.0849963	0.0346619	0.244208	-0.021172	-0.114395	0.104894	-0.147137	-0.177884	0.111692	0.0496104	-0.0514999	-0.0230236	-0.143135	0.151638	-0.293059	-0.0355411	0.25243	-0.135033	0.0105551	0.1373	-0.090558
Maltose	-0.112575	-0.0415308	-0.294108	0.00112183	-0.197514	-0.105217	-0.256547	-0.0540081	-0.107475	-0.209864	0.220203	0.243793	-0.258563	-0.0477329	0.0458305	-0.0255428	-0.240915	0.0417214	-0.000335266	0.0988777	0.0280394	0.08907	-0.0996844	-0.238256	0.0718305	-0.0873137	-0.00861527	-0.191852	0.170055	-0.240722	-0.11621	-0.0222647	-0.116969	-0.0388574	0.124913	0.150413	-0.210077	0.0674737	-0.106708	0.199784
Methionine	-0.075615	0.081029	0.274098	-0.199626	-0.0690933	-0.299342	-0.242593	0.107241	0.15471	-0.0630162	-0.0619406	-0.0214605	-0.0644808	-0.138838	0.0313033	0.103609	0.0614187	-0.0774794	-0.0738391	-0.128311	-0.109015	0.0736522	-0.265197	-0.155187	-0.418128	-0.0353426	0.144782	0.135072	0.0708486	0.0159453	0.156045	0.107217	-0.261968	-0.0603767	0.0912331	-0.0711544	0.112371	-0.0566166	-0.025259	-0.00922798
MyoInositol	-0.161026	0.0878522	0.116667	0.297421	0.149536	-0.101156	-0.0865951	0.0233721	0.0109825	0.0864507	-0.0165019	-0.186519	-0.0757807	-0.0431211	0.19988	-0.079403	-0.0314913	0.053704	0.0676223	0.230876	-0.108837	-0.042705	-0.207881	0.112304	0.0879052	-0.0878484	-0.0493928	0.183231	-0.308856	-0.303988	-0.0871882	0.108695	0.11696	-0.116029	0.145358	-0.109966	0.0522312	0.0216061	0.0101113	0.390547
OAcetylSerine	-0.205075	0.0871725	0.12937	0.00834711	-0.0708118	0.0628726	-0.0590846	-0.0935051	-0.0709824	0.107825	-0.1395	-0.237237	-0.0327498	0.058163	-0.0806692	0.225178	-0.335488	0.157017	-0.259866	0.168843	-0.101045	0.157257	0.258453	-0.0340528	0.155644	0.158079	0.110793	0.237959	-0.0528571	0.0735648	-0.152243	0.208327	-0.0694339	-0.212076	-0.202127	0.112276	-0.0609628	-0.0860746	-0.0485915	-0.119249
Ornithine	-0.218729	-0.000900819	0.0848137	0.0937537	-0.090504	-0.0458058	0.148938	-0.137182	-0.00828259	-0.11327	-0.0109318	-0.124253	-0.138775	-0.0832086	0.0207332	0.0204241	0.00837214	-0.290143	0.00348514	-0.0651402	0.190775	0.0201201	-0.00818234	-0.184587	-0.0460377	-0.127834	0.103063	-0.233293	-0.113446	0.0316279	-0.255971	-0.289306	0.23976	-0.00971103	0.0517569	0.0161447	0.217375	-0.0543518	-0.047379	-0.183167
Oxaloacetate	0.0458116	-0.283785	0.0983179	-0.0197361	0.00421905	-0.150537	0.0552022	-0.154502	0.221066	-0.253043	-0.0281635	-0.015123	0.0195781	0.085572	-0.12525	-0.325287	-0.100469	0.374035	-0.148841	-0.090219	0.096876	0.119334	0.133591	-0.123438	-0.00784805	-0.134921	-0.202295	0.153363	0.00836123	-0.255878	-0.0565358	0.0997968	0.0631419	0.114034	-0.0032641	-0.0124557	0.383282	0.0675949	-0.0432396	-0.0781859
Phenylalanine	-0.231063	-0.0383421	-0.0333494	0.0232545	-0.0175263	0.0751838	-0.111315	0.034156	0.0174185	0.143889	-0.0259488	0.127551	-0.0700606	0.0531291	-0.23528	-0.0643748	-0.0121913	-0.0600367	0.0536673	0.0416436	-0.107097	-0.171908	0.155961	0.188076	0.00268458	0.0408121	0.0469284	0.274394	-0.113609	0.142195	0.113882	-0.345479	-0.175308	0.152376	0.365545	0.314622	0.22763	0.215179	-0.216512	0.0875559
Proline	-0.18395	-0.0368826	-0.122228	0.181248	0.101872	-0.0877776	-0.0856405	-0.120394	-0.110866	0.209516	-0.22198	-0.0993068	-0.195626	0.0591602	0.261371	0.107364	0.211849	0.277128	-0.0754993	-0.0181721	0.152022	0.369025	0.188381	-0.06415	-0.101579	0.0249032	0.15667	-0.0355839	0.0896025	-0.117808	0.126708	-0.261968	-0.131841	0.233913	0.0237626	-0.0221824	-0.101305	0.0499182	0.106687	-0.0417698
Putrescine	-0.118615	-0.13116	0.249068	0.10879	0.0141371	0.13734	0.205368	-0.156962	0.159678	-0.148483	-0.340416	0.130432	0.000518182	-0.209647	0.0205634	0.0108104	-0.180488	0.0342442	0.280191	0.234208	0.03366	0.121789	-0.104483	0.0543923	-0.0154928	0.218496	0.0639769	-0.198986	0.237384	0.111085	0.219363	0.0595393	0.0468033	-0.0360272	-0.0134448	0.119162	0.0982352	0.108394	-0.12991	0.0207187
Pyruvicacid	-0.129863	0.112601	0.109099	-0.266452	0.0995859	-0.256866	-0.0615709	0.181647	0.0401237	-0.122784	-0.141605	-0.0489171	-0.216669	0.20265	0.180028	-0.0948075	0.0855982	0.152981	0.148977	0.0657619	-0.224431	-0.0229253	-0.24515	0.0790711	0.0181762	0.146219	-0.0874067	-0.053839	-0.11895	0.0946154	-0.120458	-0.0992982	0.133123	0.0276976	-0.114181	0.167354	0.0412903	0.0168051	0.0761065	-0.113645
Raffinose	-0.0576775	-0.115103	0.337173	0.13678	0.0857455	0.133334	0.147478	0.143829	-0.0449411	0.0839055	0.304997	0.0593928	-0.0798094	0.0750945	0.238608	-0.495727	-0.261186	-0.0104879	-0.175808	-0.236301	0.0245499	0.0263137	-0.0122495	0.0212418	-0.136656	0.185075	0.175031	0.0297014	0.0112652	0.140965	-0.0605686	-0.0522544	-0.0753682	0.124312	-0.0254834	0.0546386	-0.22747	-0.0866349	0.0257111	0.0658591
Serine	-0.178729	0.205093	-0.0647201	0.0182988	0.0217313	0.0408025	-0.147899	-0.0988279	0.0759371	-0.0611469	-0.0218553	-0.134169	0.0367377	0.0492166	0.183752	-0.0897202	-0.0760696	-0.212321	0.164547	0.157247	0.227025	0.00998541	0.073103	-0.129456	-0.230793	0.105769	-0.222632	0.0248914	-0.065547	0.185179	0.00891275	0.0066695	0.0411463	0.249385	-0.20654	-0.202474	-0.06332	0.132617	-0.0575233	0.0197805
Shikimicacid	-0.124607	-0.229839	-0.136948	0.0147526	0.00913177	-0.133693	0.106851	-0.0450366	0.336935	-0.00528631	-0.0598918	0.00607991	0.214745	-0.0796049	0.105284	-0.110009	0.163137	-0.0771573	0.0307023	-0.034284	-0.356638	0.0844032	0.0473787	0.0636153	0.0678683	-0.187876	0.165793	0.177201	0.181692	-0.0299246	-0.115146	-0.238136	-0.0283961	-0.073564	-0.152721	-0.130461	-0.216218	-0.0137973	-0.0731109	-0.09788
Spermidine	-0.182819	-0.0496004	0.0217171	-0.0474959	-0.279827	-0.139176	0.0773216	-0.223633	0.0128132	0.00150551	0.241	0.125298	0.0419938	-0.100188	0.14805	0.136844	-0.114439	-0.119382	-0.0917351	0.146874	-0.0983217	-0.17328	0.0879992	0.0292411	-0.0790347	0.0697798	0.212812	0.198271	0.0338742	0.018993	-0.154352	-0.0838061	0.157362	-0.094103	0.0476577	-0.232256	0.107056	0.14124	0.188308	-0.0480742
Succinicacid	-0.131598	-0.184312	-0.140163	0.0630906	-0.0746491	0.0903665	-0.0219787	0.396196	0.0617345	-0.123961	0.0347007	-0.108637	0.19567	0.154345	0.00651483	0.271784	-0.0462982	0.0932179	-0.0778621	-0.178871	-0.2087	0.139713	-0.0580104	-0.203586	0.0610561	0.0974331	0.118351	-0.247908	-0.201014	0.175385	-0.175672	-0.00260504	0.0460949	0.149973	0.0196214	0.0876455	0.187413	0.0742737	0.0580545	0.0610532
Sucrose	0.02669	0.0948279	-0.041038	0.361048	0.291502	-0.184276	-0.186687	-0.122839	-0.0226739	-0.16634	0.0759176	-0.0220562	-0.00325061	-0.10202	-0.280994	0.0334136	-0.119879	-0.0275065	-0.218226	-0.0264337	-0.120916	-0.184794	-0.0875343	0.146856	-0.142169	-0.125756	0.105158	-0.0904298	-0.0675384	-0.0131435	0.125847	-0.0522251	0.146864	0.160646	-0.355295	0.193297	-0.0876531	0.248601	0.103678	-0.167431
Threitol	-0.117941	-0.201504	-0.171648	-0.110128	-0.0357504	-0.146942	-0.214342	-0.233172	0.150699	0.0262378	-0.110781	-0.108215	-0.0302059	-0.0105095	-0.165195	-0.161745	-0.137428	0.19137	0.0779496	-0.075018	-0.0550368	-0.0767289	0.0381313	0.135867	-0.127802	0.0478244	-0.0292036	-0.226503	-0.128696	0.325273	-0.0596698	0.134675	0.136924	-0.149068	0.250656	-0.0383192	-0.364231	-0.103734	-0.0334664	-0.0096305
Threonicacid	-0.092227	-0.24886	-0.1745	0.108234	-0.155872	0.171472	-0.0421513	0.037281	0.0678434	-0.0983131	-0.012071	-0.161129	0.0934183	-0.000560435	0.130221	-0.098113	-0.0814337	-0.1153	-0.142624	0.132777	-0.0997579	-0.032352	-0.29392	-0.014242	0.230947	0.110656	0.130913	-0.0776212	-0.10376	-0.0986595	0.428172	0.0427702	-0.0626693	0.0613917	-0.074843	-0.15287	0.042479	0.0188983	-0.0774524	-0.00525817
Threonine	-0.129603	0.2393	0.0445508	-0.0967194	0.146164	0.171099	-0.0783257	-0.0519744	0.0806067	-0.161011	-0.162356	0.0543577	0.0751176	0.0550194	-0.0672758	0.0528657	-0.260616	0.0498648	-0.0994196	-0.00729625	0.0864444	-0.214983	-0.198606	-0.117692	0.167201	-0.000296463	0.12162	0.0972796	0.285906	-0.0623092	-0.10685	-0.0338012	-0.0782648	0.23248	0.238	-0.0387	-0.00313519	-0.125093	0.341832	-0.0994251
Trehalose	-0.0828601	-0.135267	-0.223153	0.0577352	0.193001	-0.175609	0.243641	-0.0453487	-0.242672	-0.332882	-0.210592	0.111644	-0.0211924	-0.0153236	-0.0289112	0.032558	0.0706879	-0.29705	-0.243977	-0.121534	0.0637495	0.211793	-0.026626	0.178589	-0.0423056	0.211502	-0.10409	0.198955	-0.116013	0.0911567	-0.0105551	0.186336	0.0311894	0.0281559	0.27088	-0.0831989	-0.0402805	-0.0552142	0.148761	0.0821541
Tryptophan	-0.139192	-0.244125	-0.0813286	0.0780042	-0.0522038	-0.0979685	-0.0882808	0.0167376	-0.0366011	0.155312	0.136306	-0.141985	-0.0141216	0.289848	0.0896442	-0.0482836	0.0187303	-0.111186	0.178455	0.099523	0.298891	-0.0251416	-0.0992488	0.313108	-0.00623326	-0.204643	0.154464	-0.0519383	0.167714	0.0259811	0.0236686	0.221309	-0.0181342	-0.126321	0.00953487	0.242812	0.226781	-0.158309	0.270873	-0.186756
Tyrosine	-0.222965	0.0278212	0.0489016	-0.0649422	-0.133952	0.0192466	0.0268536	-0.107126	-0.157109	0.0370819	0.0654353	0.0313089	-0.0612776	0.167026	-0.185634	0.00932295	0.0359021	-0.102583	0.0930014	-0.238463	-0.186277	0.177584	-0.214302	0.261334	0.106792	0.140048	-0.188986	0.00271936	0.194951	-0.203866	0.00682215	0.021547	-0.188966	0.0213591	-0.16754	-0.0717282	-0.0786135	0.157036	0.0660007	-0.141273
Valine	-0.151619	0.030771	-0.00191574	-0.22494	0.113023	0.276134	-0.185885	0.0075535	-0.176401	-0.286903	0.0749628	-0.079149	0.0928404	0.0367128	0.138098	-0.20961	0.302689	-0.0788147	-0.0117671	0.196481	-0.0870852	-0.0424861	0.168918	-0.00482007	-0.0177463	0.0381587	0.102894	0.0412504	-0.00607916	-0.173871	-0.107924	0.221712	0.0651743	0.0709711	0.10115	0.0926677	-0.0809944	0.114663	-0.248016	-0.332271
